# Supplementary material for: Novel Anthraquinone-Based Benzenesulfonamide Derivatives and Their Analogues as Potent Human Carbonic Anhydrase Inhibitors with Antitumor Activity: Synthesis, Biological Evaluation, and In Silico Analysis
Source: MDPI journal article supplement (doi:10.3390/ijms25063348), 2024-03-15
Supplement: s1 [file s1]

## Supplementary materials

# **Novel Anthraquinone-Based Benzenesulfonamide Derivatives and Their Analogues as Potent Human Carbonic Anhydrase Inhibitors with Antitumor Activity: Synthesis, Biological Evaluation, and In Silico Analysis**

### Contents

1. Figure S1
2. Tables S1 and S2
3.  $^1\text{H}$ -NMR,  $^{13}\text{C}$ -NMR and HRMS Spectra data S1–S23
4. HPLC data S24

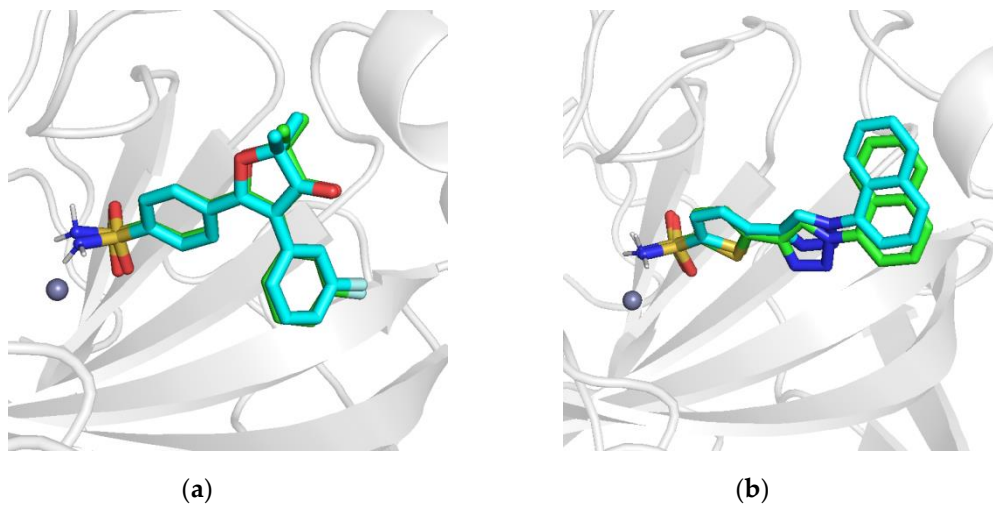

**Figure S1.** Result of redocking. (a) Crystal conformation of CA II and original ligand (cyan) and docked conformation (green); (b) Crystal conformation of CA IX and original ligand (cyan) and docked conformation (green).

**Table S1.** The docking score, binding interactions, and IC<sub>50</sub> of the active compounds in *hCA II* enzyme

| Compound | Docking score (Kcal/mol) | Amino acid interactions  | Interacting groups                          | IC <sub>50</sub> (nM) |
|----------|--------------------------|--------------------------|---------------------------------------------|-----------------------|
| 5c       | -12.98                   | Zn <sup>2+</sup> (metal) | NH of SO <sub>2</sub> NH <sub>2</sub>       | 41.58                 |
|          |                          | T198 (H-bond)            | NH and O of SO <sub>2</sub> NH <sub>2</sub> |                       |
|          |                          | F130 (pi-stacking)       | Anthraquinone ring                          |                       |
|          |                          | E69 (hydrophobic)        |                                             |                       |
|          |                          | I91 (hydrophobic)        |                                             |                       |
|          |                          | Q92 (hydrophobic)        |                                             |                       |
|          |                          | V121 (hydrophobic)       |                                             |                       |
|          |                          | L197 (hydrophobic)       |                                             |                       |
| 5h       | -13.17                   | Zn <sup>2+</sup> (metal) | NH of SO <sub>2</sub> NH <sub>2</sub>       | 21.19                 |
|          |                          | N67 (H-bond)             | O of anthraquinone ring                     |                       |
|          |                          | Q92 (H-bond)             | O of anthraquinone ring                     |                       |
|          |                          | T198 (H-bond)            | NH and O of SO <sub>2</sub> NH <sub>2</sub> |                       |
|          |                          | F130 (pi-stacking)       | Anthraquinone ring                          |                       |
|          |                          | L60 (hydrophobic)        |                                             |                       |
|          |                          | L91 (hydrophobic)        |                                             |                       |
|          |                          | V121 (hydrophobic)       |                                             |                       |
|          |                          | L140 (hydrophobic)       |                                             |                       |
|          |                          | V142 (hydrophobic)       |                                             |                       |
| 6c       | -12.83                   | Zn <sup>2+</sup> (metal) | NH of SO <sub>2</sub> NH <sub>2</sub>       | 68.34                 |
|          |                          | T198 (H-bond)            | NH and O of SO <sub>2</sub> NH <sub>2</sub> |                       |
|          |                          | T199 (H-bond)            | O of SO <sub>2</sub> NH <sub>2</sub>        |                       |
|          |                          | F130 (pi-stacking)       | Anthraquinone ring                          |                       |
|          |                          | E69 (hydrophobic)        |                                             |                       |
|          |                          | I91 (hydrophobic)        |                                             |                       |
|          |                          | Q92 (hydrophobic)        |                                             |                       |
|          |                          | L197 (hydrophobic)       |                                             |                       |
| 5k       | -9.97                    | N67 (H-bond)             | O of SO <sub>2</sub> NH                     | 155.91                |
|          |                          | Q92 (H-bond)             | O of SO <sub>2</sub> NH                     |                       |
|          |                          | T199 (H-bond)            | O of anthraquinone ring                     |                       |
|          |                          | H94 (pi-stacking)        | Anthraquinone ring                          |                       |
|          |                          | F130 (pi-stacking)       | Benzene ring                                |                       |
|          |                          | GLU69 (hydrophobic)      |                                             |                       |
|          |                          | GLN92 (hydrophobic)      |                                             |                       |
|          |                          | VAL121 (hydrophobic)     |                                             |                       |
|          |                          | LEU140 (hydrophobic)     |                                             |                       |
|          |                          | VAL142 (hydrophobic)     |                                             |                       |
|          |                          | LEU197 (hydrophobic)     |                                             |                       |
|          |                          | THR198 (hydrophobic)     |                                             |                       |
|          |                          | TRP208 (hydrophobic)     |                                             |                       |

**Table S2.** The docking score, binding interactions, and IC<sub>50</sub> of the active compounds in *hCA IX* enzyme

| Compound | Docking score<br>(Kcal/mol) | Amino acid interactions  | Interacting groups                    | IC <sub>50</sub> (nM) |
|----------|-----------------------------|--------------------------|---------------------------------------|-----------------------|
| 5c       | -13.08                      | Zn <sup>2+</sup> (metal) | NH of SO <sub>2</sub> NH <sub>2</sub> | 40.58                 |
|          |                             | W9 (H-bond)              | O of amide                            |                       |
|          |                             | E106 (H-bond)            | NH of SO <sub>2</sub> NH <sub>2</sub> |                       |
|          |                             | T200 (H-bond)            | O of SO <sub>2</sub> NH <sub>2</sub>  |                       |
|          |                             | T201 (H-bond)            | NH of amide                           |                       |
|          |                             | P202 (H-bond)            | NH of amide                           |                       |
|          |                             | V20 (hydrophobic)        |                                       |                       |
|          |                             | L199 (hydrophobic)       |                                       |                       |
|          |                             | P202 (hydrophobic)       |                                       |                       |
|          |                             | P203 (hydrophobic)       |                                       |                       |
| 5h       | -13.19                      | Zn <sup>2+</sup> (metal) | NH of SO <sub>2</sub> NH <sub>2</sub> | 46.19                 |
|          |                             | W9 (H-bond)              | O of amide                            |                       |
|          |                             | E106 (H-bond)            | NH of SO <sub>2</sub> NH <sub>2</sub> |                       |
|          |                             | T200 (H-bond)            | O of SO <sub>2</sub> NH <sub>2</sub>  |                       |
|          |                             | P202 (H-bond)            | NH of amide                           |                       |
|          |                             | V20 (hydrophobic)        |                                       |                       |
|          |                             | L199 (hydrophobic)       |                                       |                       |
|          |                             | P202 (hydrophobic)       |                                       |                       |
|          |                             | P203 (hydrophobic)       |                                       |                       |
|          |                             |                          |                                       |                       |
| 6c       | -12.06                      | Zn <sup>2+</sup> (metal) | NH of SO <sub>2</sub> NH <sub>2</sub> | 34.88                 |
|          |                             | Q92 (H-bond)             | NH of amide                           |                       |
|          |                             | E106 (H-bond)            | NH of SO <sub>2</sub> NH <sub>2</sub> |                       |
|          |                             | T200 (H-bond)            | O of SO <sub>2</sub> NH <sub>2</sub>  |                       |
|          |                             | V121 (hydrophobic)       |                                       |                       |
|          |                             | V130 (hydrophobic)       |                                       |                       |
|          |                             | D131 (hydrophobic)       |                                       |                       |
|          |                             | L134 (hydrophobic)       |                                       |                       |
|          |                             | L199 (hydrophobic)       |                                       |                       |
|          |                             |                          |                                       |                       |
| 5k       | -9.46                       | W9 (H-bond)              | O of amide                            | 226.58                |
|          |                             | T200 (H-bond)            | O of anthraquinone ring               |                       |
|          |                             | T201 (H-bond)            | O of anthraquinone ring               |                       |
|          |                             | P202 (H-bond)            | NH of amide                           |                       |
|          |                             | H94 (pi-stacking)        | Anthraquinone ring                    |                       |
|          |                             | W9 (hydrophobic)         |                                       |                       |
|          |                             | H119 (hydrophobic)       |                                       |                       |
|          |                             | V121 (hydrophobic)       |                                       |                       |
|          |                             | V142 (hydrophobic)       |                                       |                       |
|          |                             | L199 (hydrophobic)       |                                       |                       |
|          |                             | P203 (hydrophobic)       |                                       |                       |
|          |                             | W210 (hydrophobic)       |                                       |                       |

Data S1.  $^1\text{H}$ -NMR,  $^{13}\text{C}$ -NMR and HRMS data of compound 5a

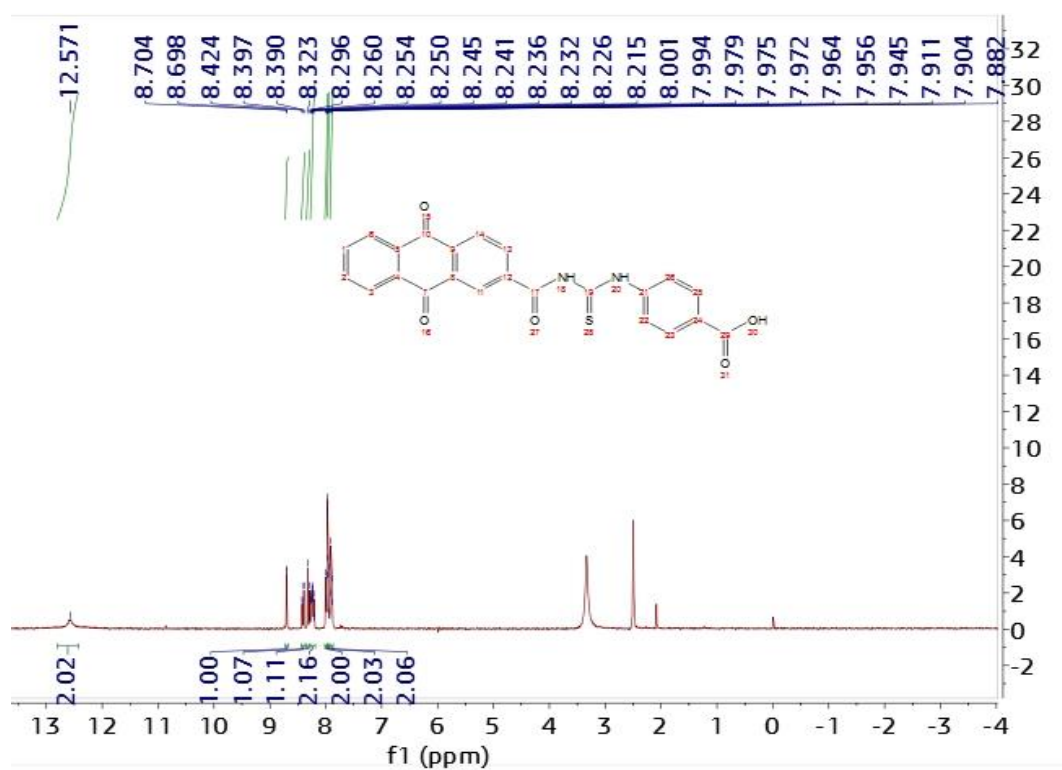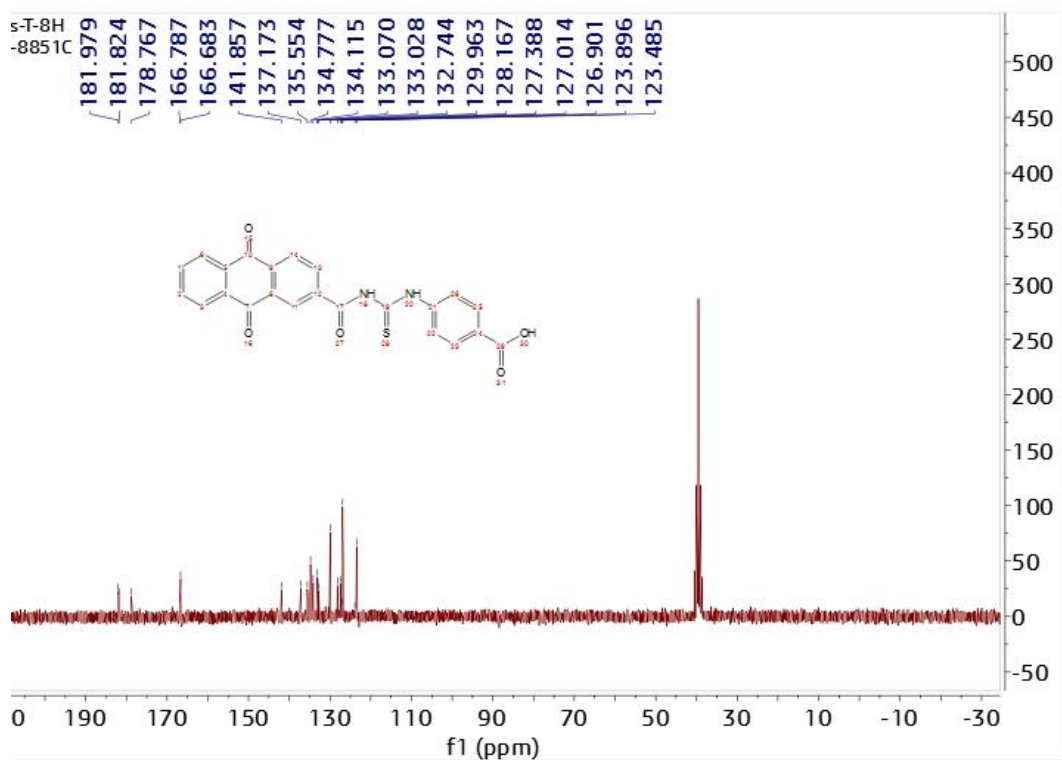

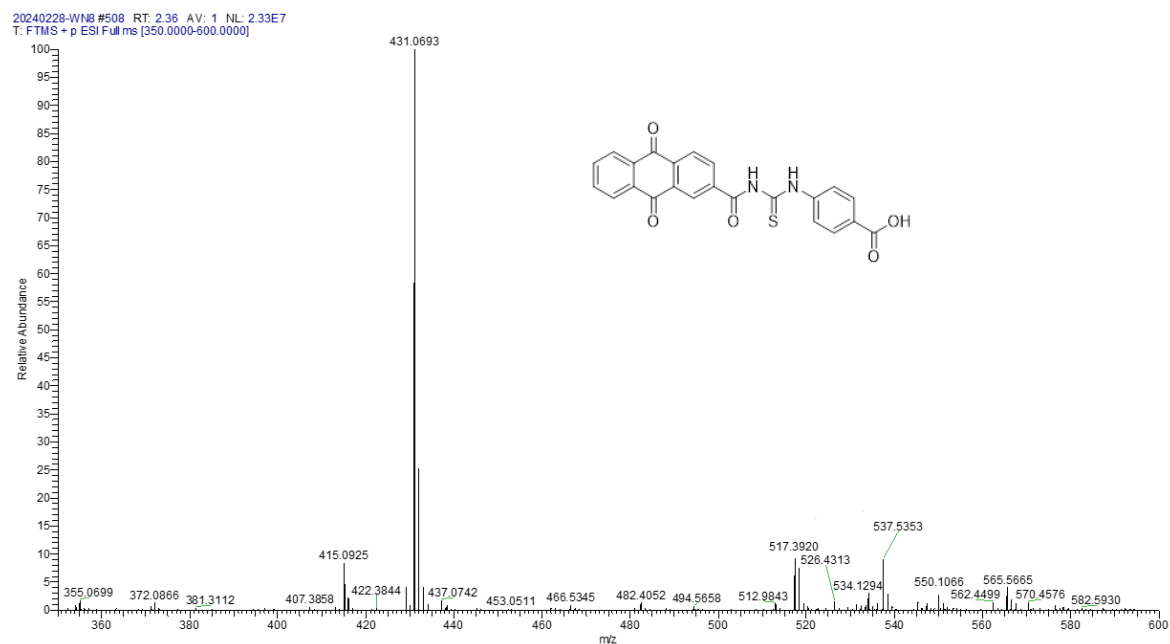

Data S2.  $^1\text{H}$ -NMR,  $^{13}\text{C}$ -NMR and HRMS data of compound 5b

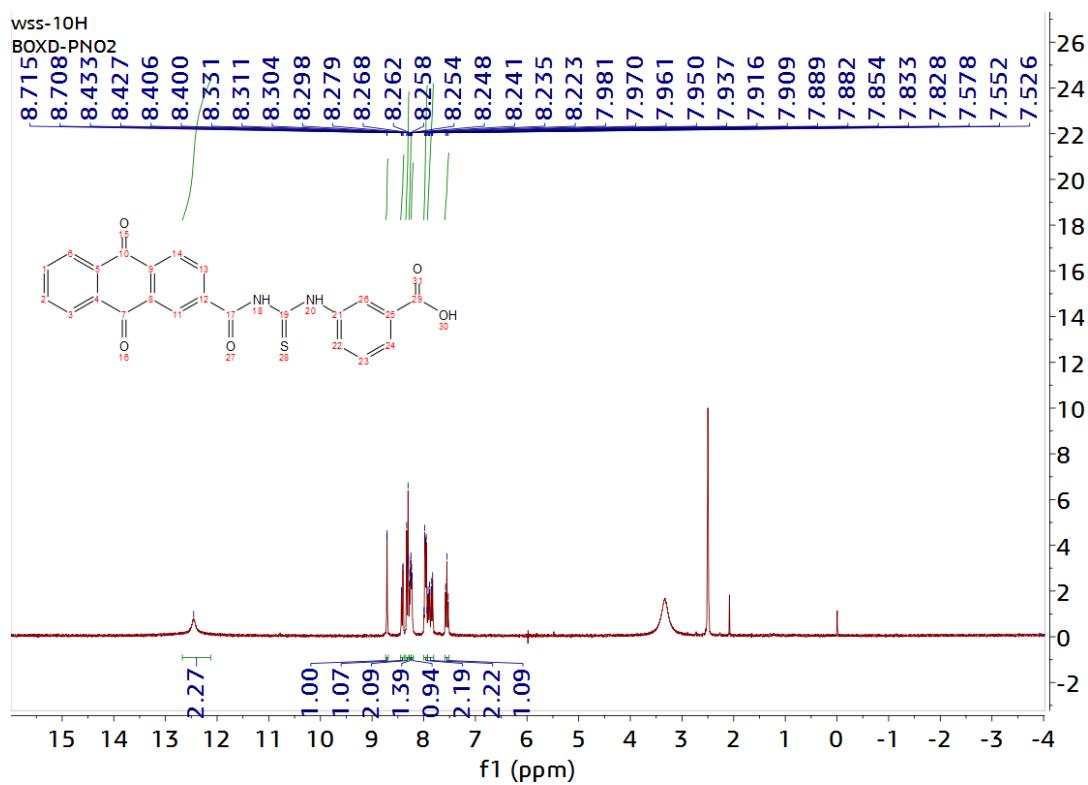

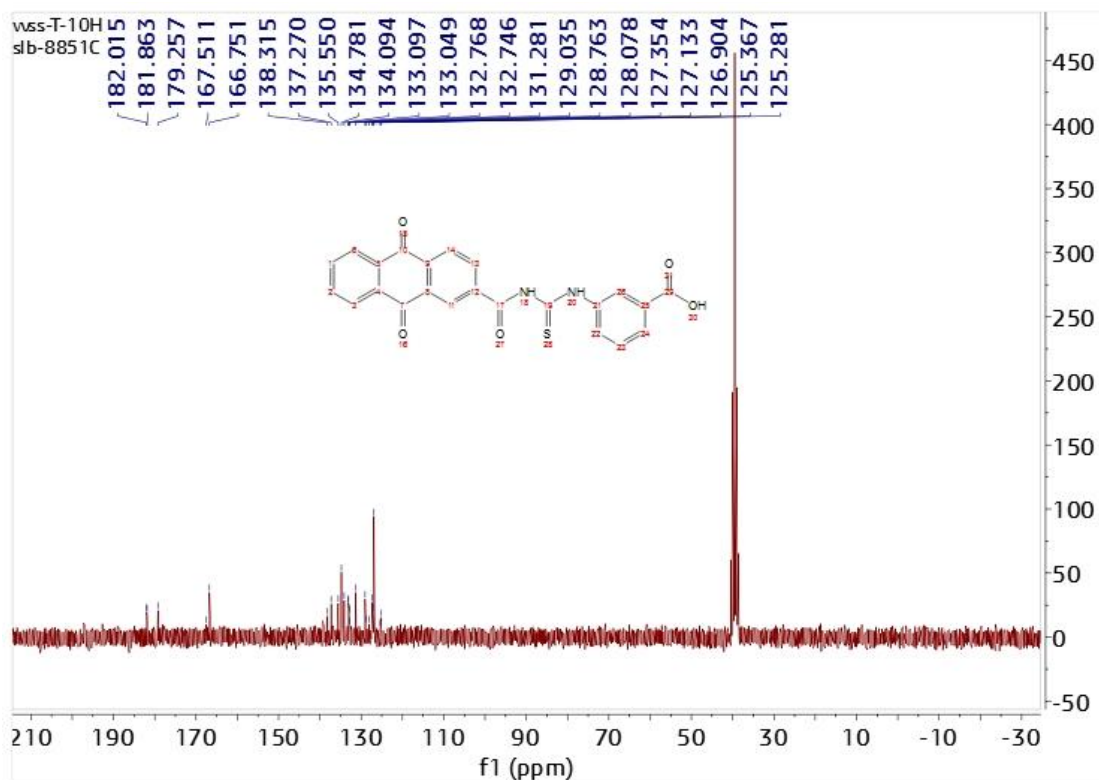

20240228-WN10 #483 RT: 2.25 AV: 1 NL: 6.43E7  
T: FTMS + p ESI Full ms [350.0000-600.0000]

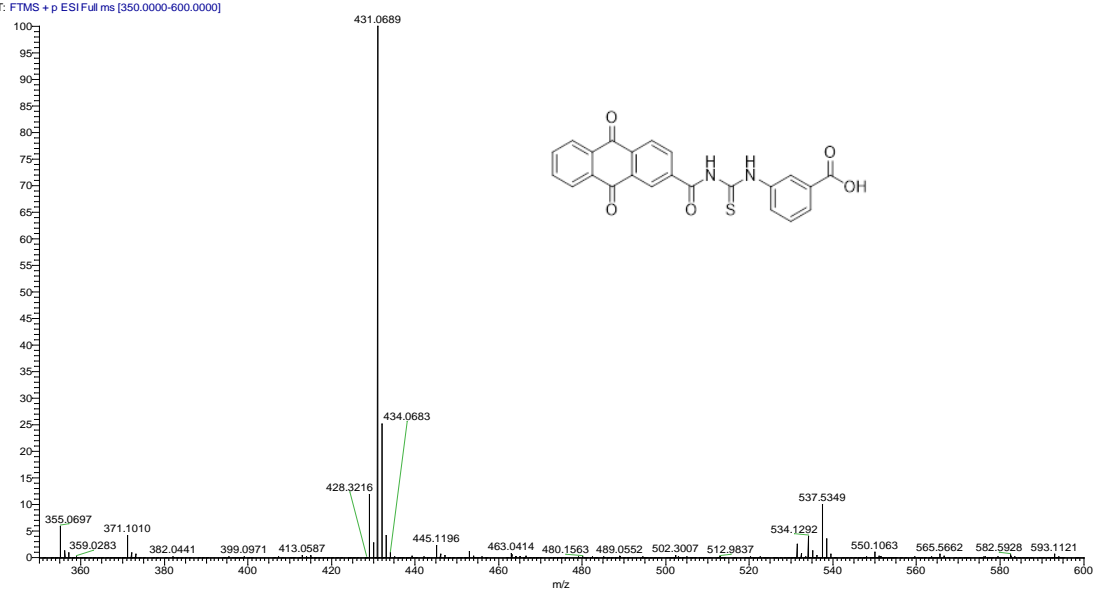

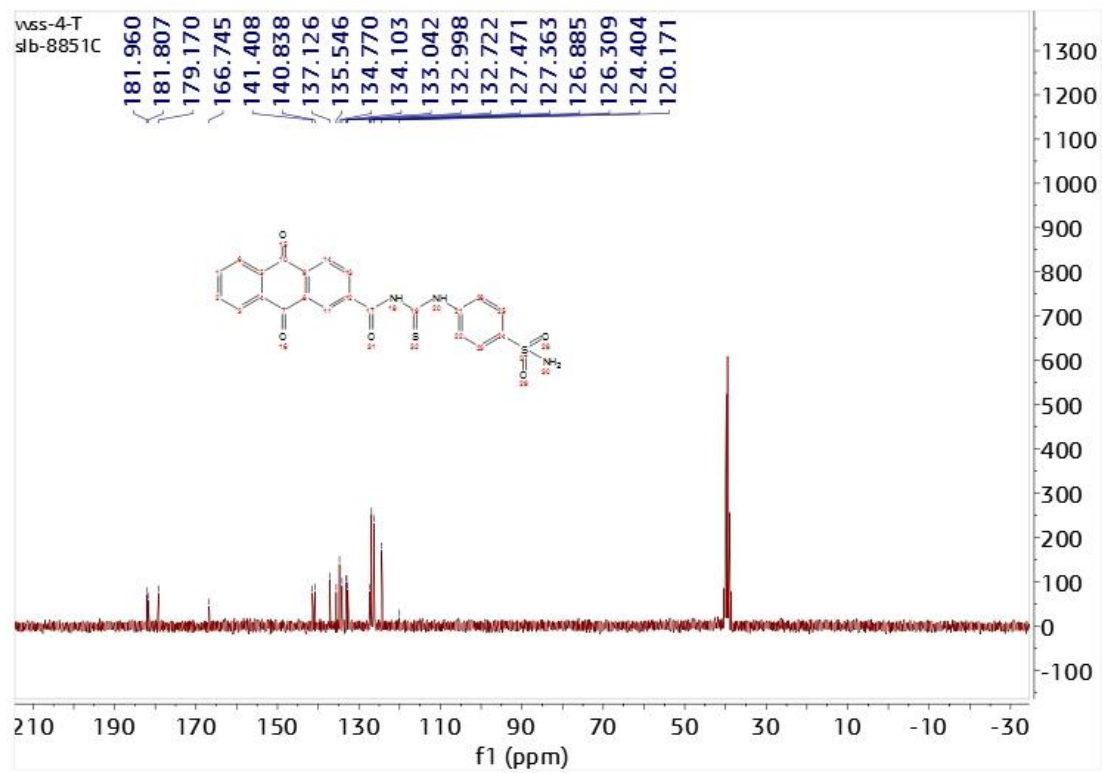



20240228-WN4 #496 RT: 2.30 AV: 1 NL: 6.36E7  
T: FTMS + p ESI Full ms [350.0000-600.0000]

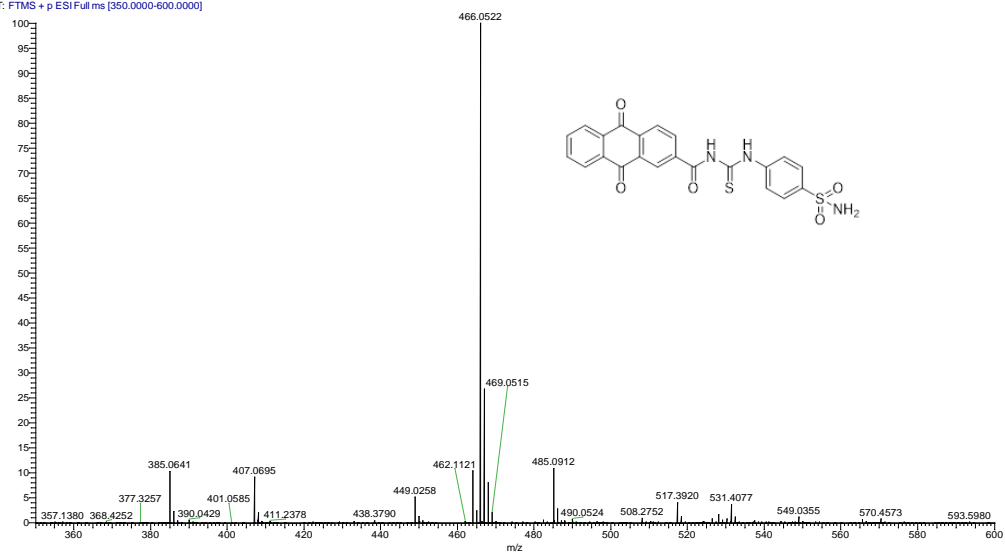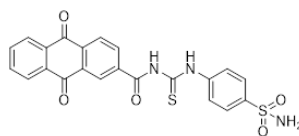

Data S4.  $^1\text{H}$ -NMR,  $^{13}\text{C}$ -NMR and HRMS data of compound 5d

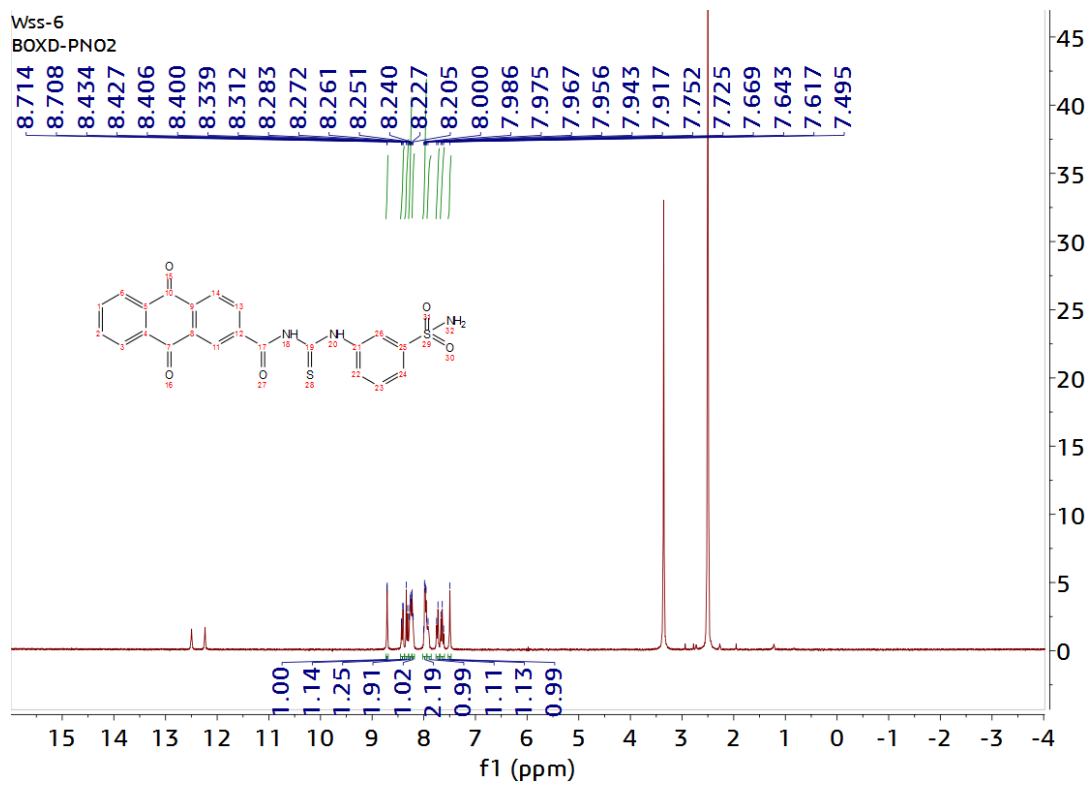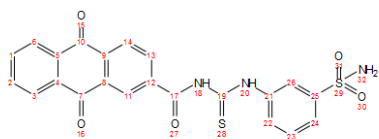

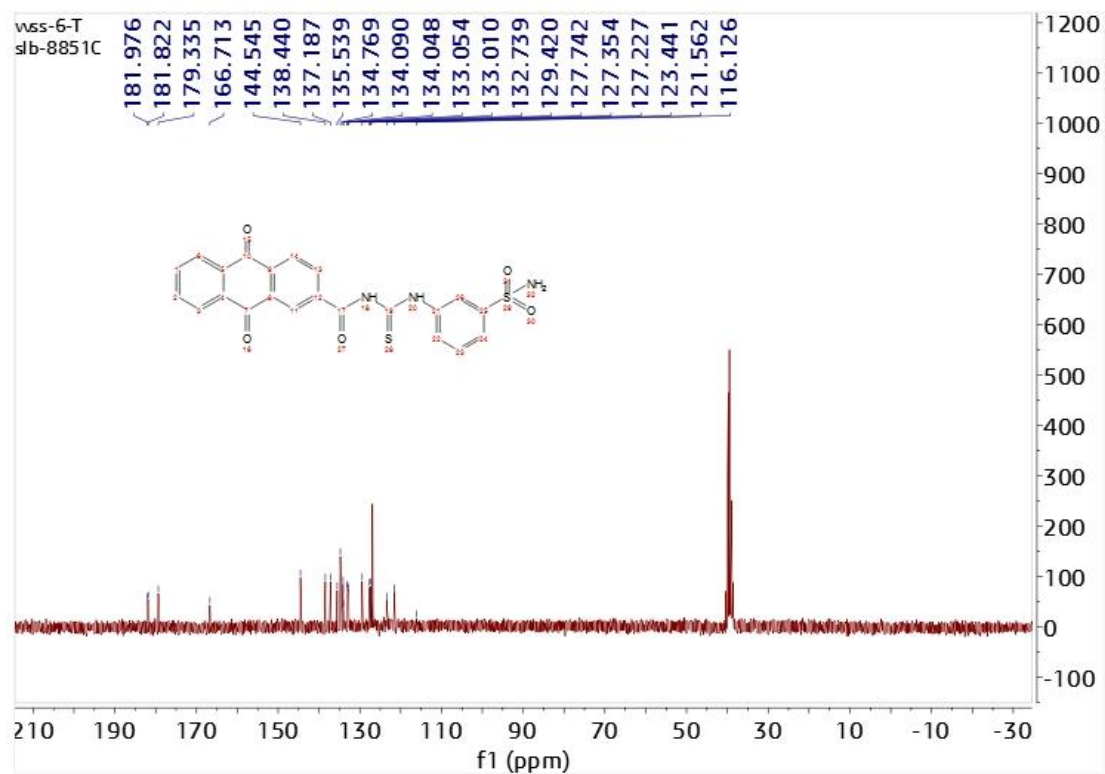

20240228-WN6 #464 RT: 2.16 AV: 1 NL: 8.04E7  
T: FTMS + p ESI Full ms [350.0000-600.0000]

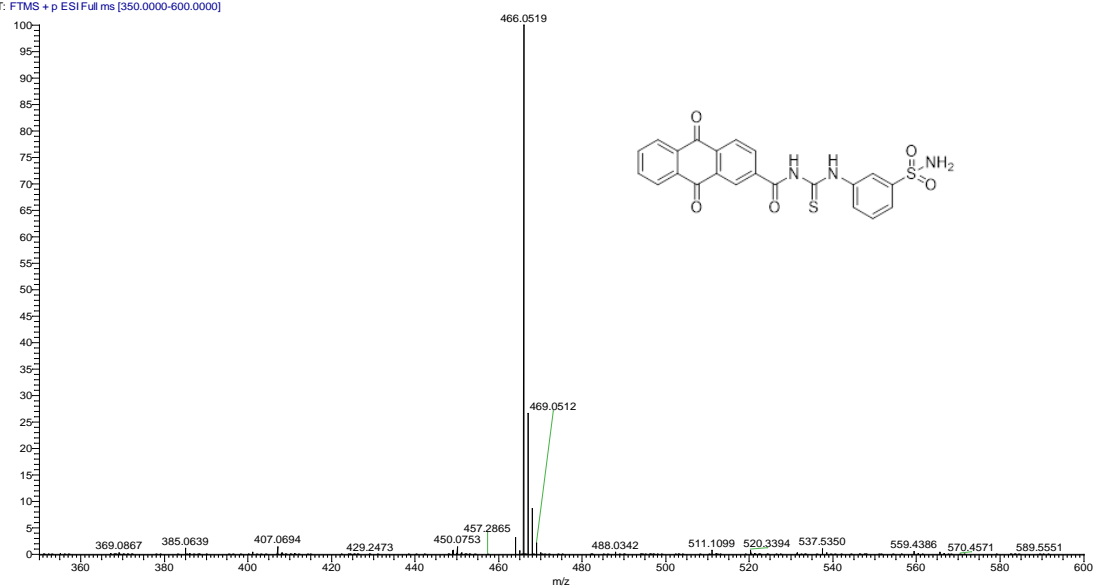

Data S5.  $^1\text{H}$ -NMR,  $^{13}\text{C}$ -NMR and HRMS data of compound 5e

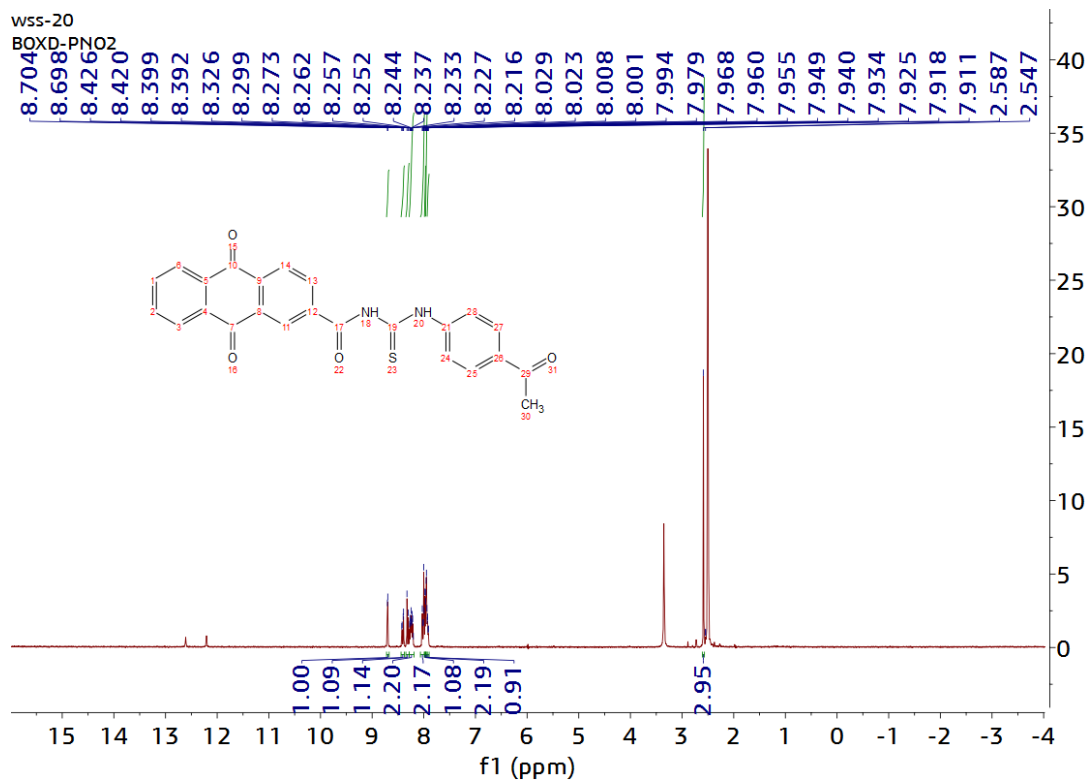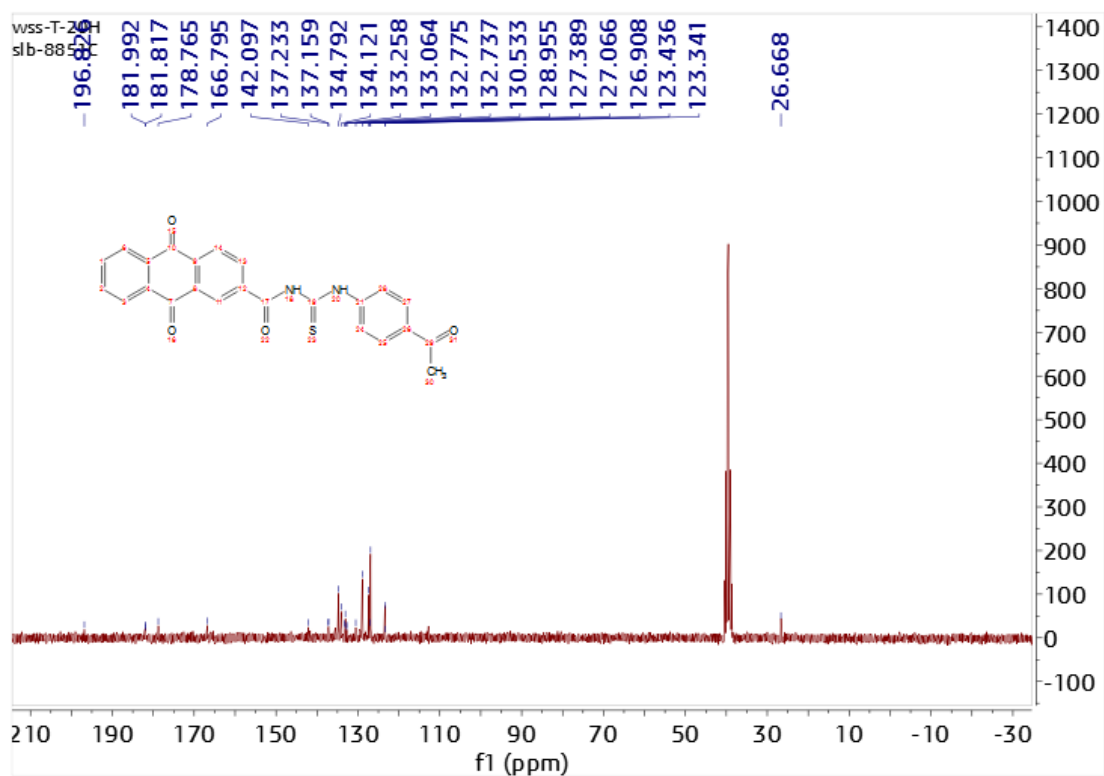

20240228-WN20 #515 RT: 2.39 AV: 1 NL: 3.90E7  
T: FTMS -p ESI Full ms [350.0000-600.0000]

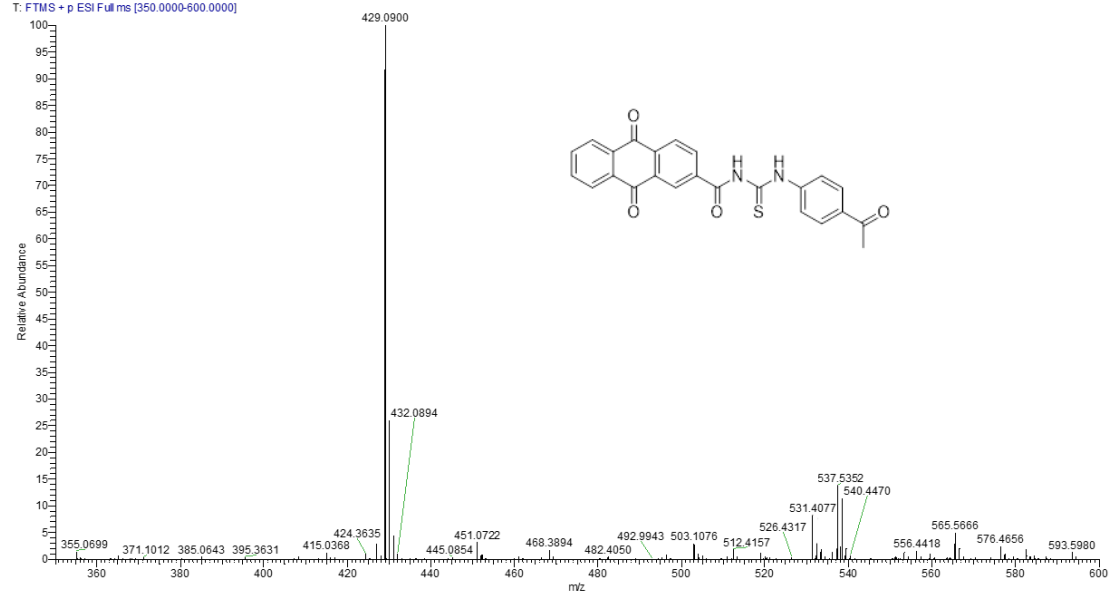

Data S6.  $^1\text{H}$ -NMR,  $^{13}\text{C}$ -NMR and HRMS data of compound 5f

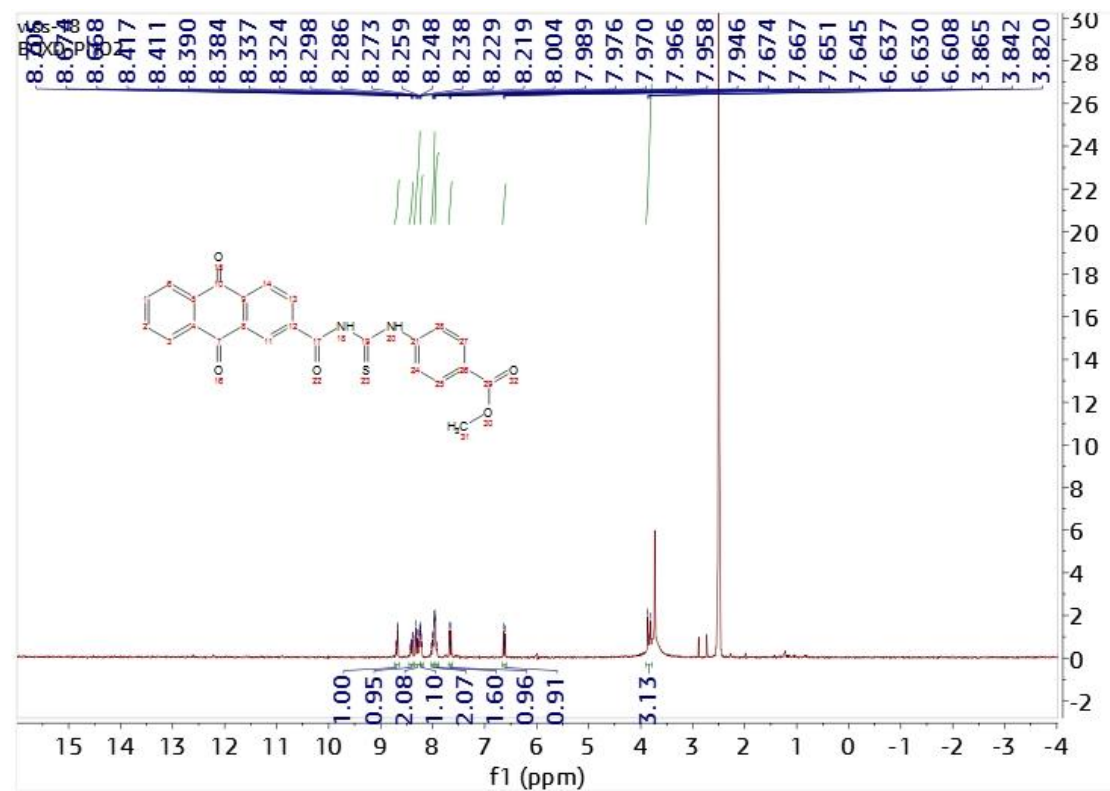

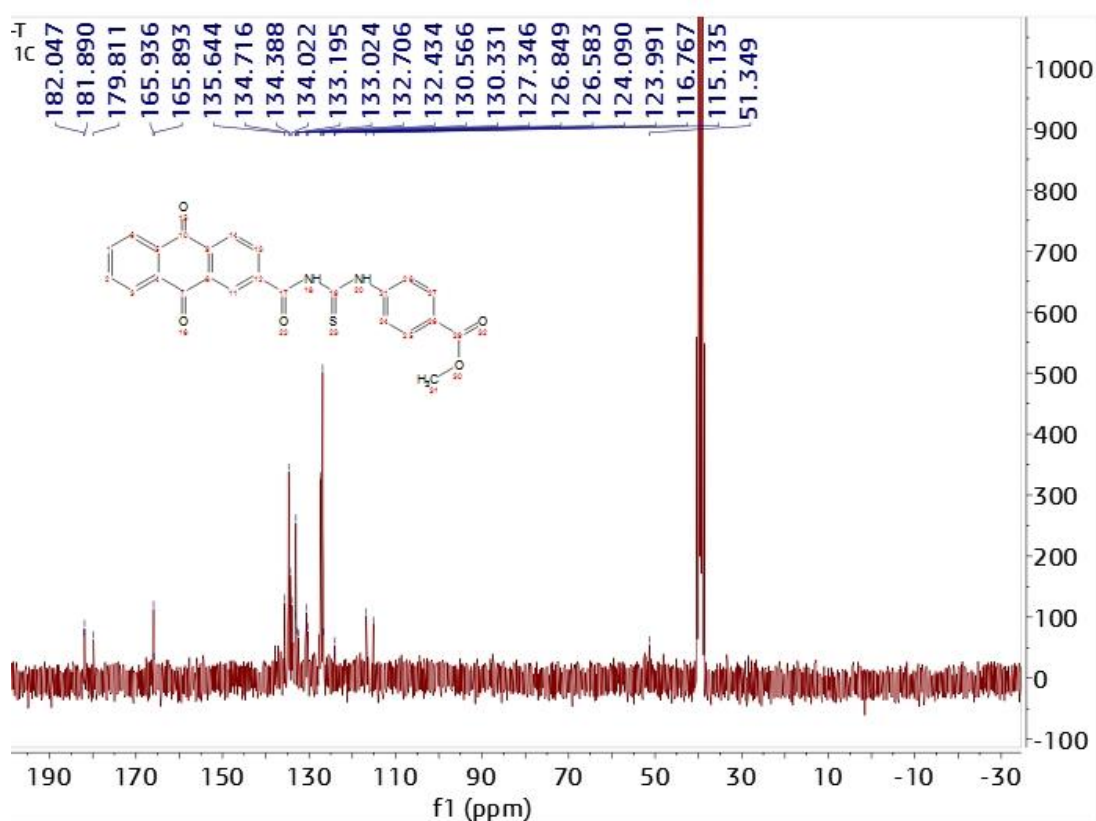

20240228-WN14 #521 RT: 2.41 AV: 1 NL: 9.98E7  
T: FTMS + p ESI Full ms [350.0000-600.0000]

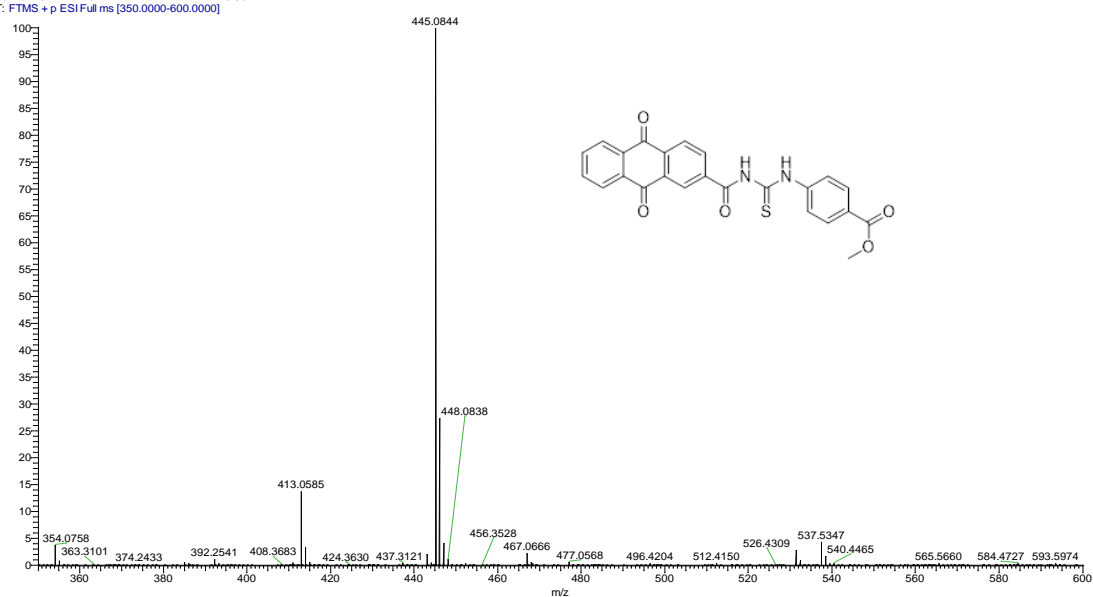

Data S7. <sup>1</sup>H-NMR, <sup>13</sup>C-NMR and HRMS data of compound 5g

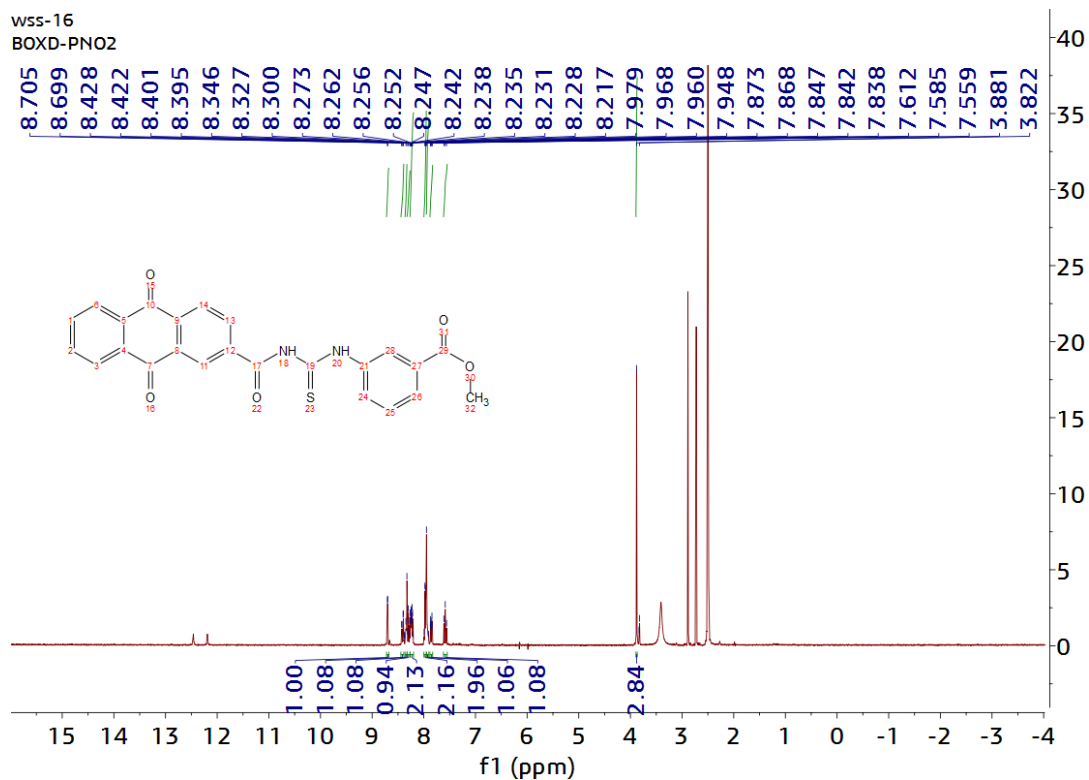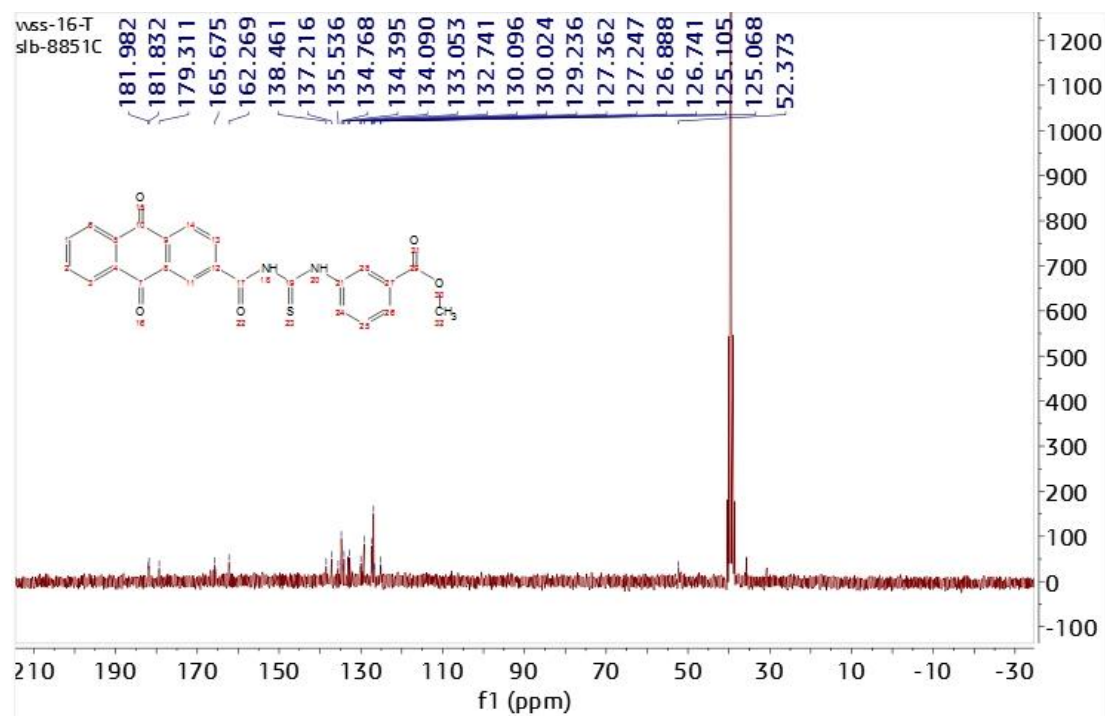

20240228-WN16 #520 RT: 2.41 AV: 1 NL: 6.80E7  
T: FTMS + p ESI Full ms [350.0000-600.0000]

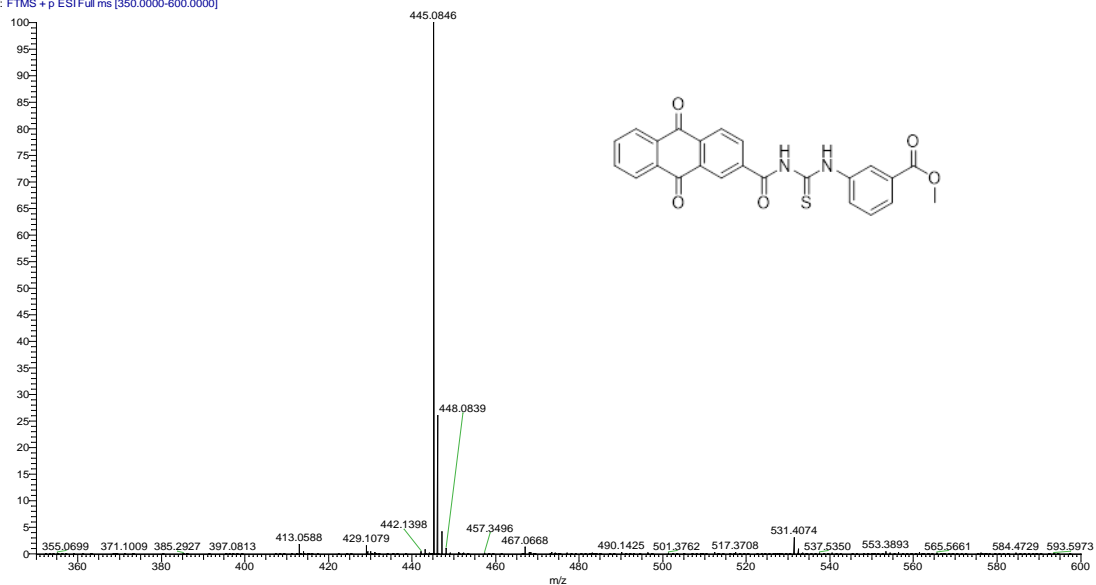

Data S8.  $^1\text{H}$ -NMR,  $^{13}\text{C}$ -NMR and HRMS data of compound 5h

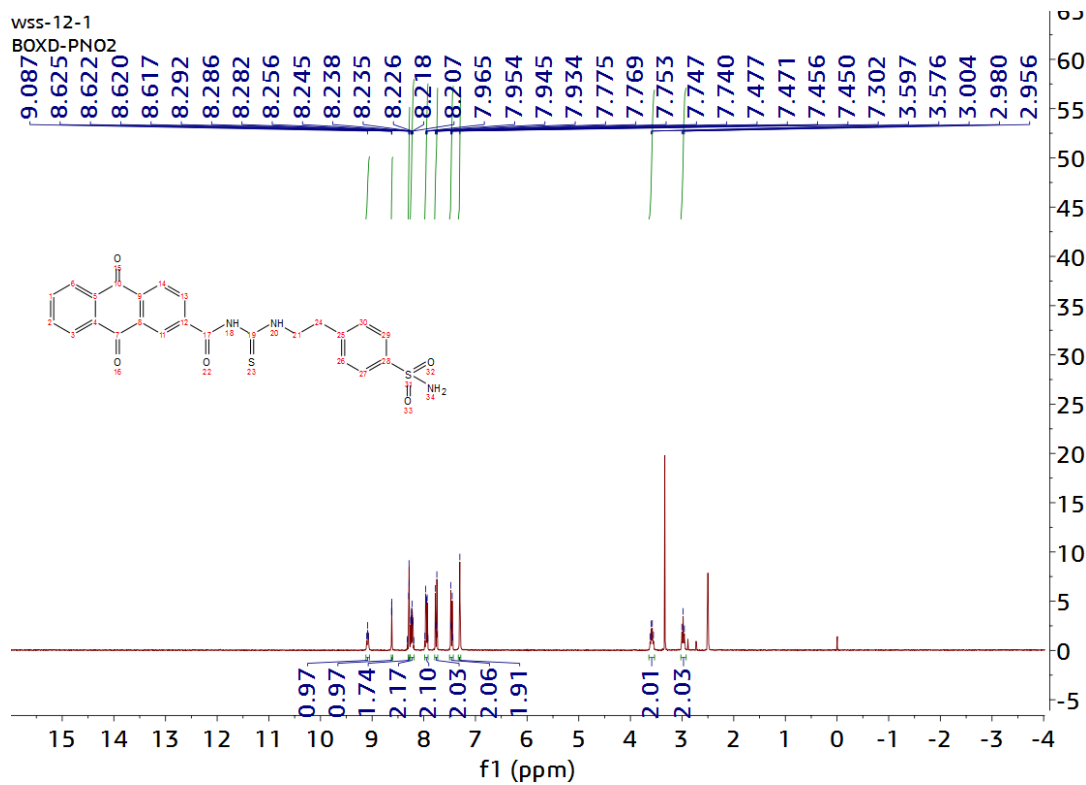

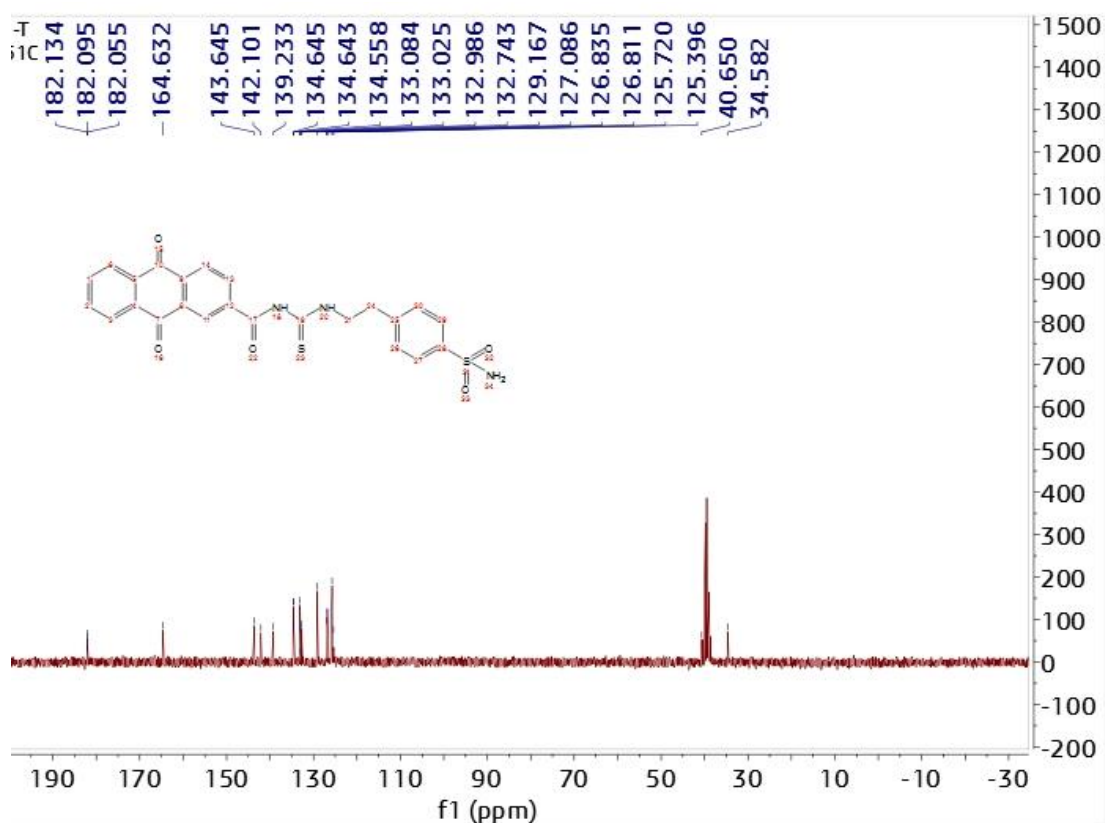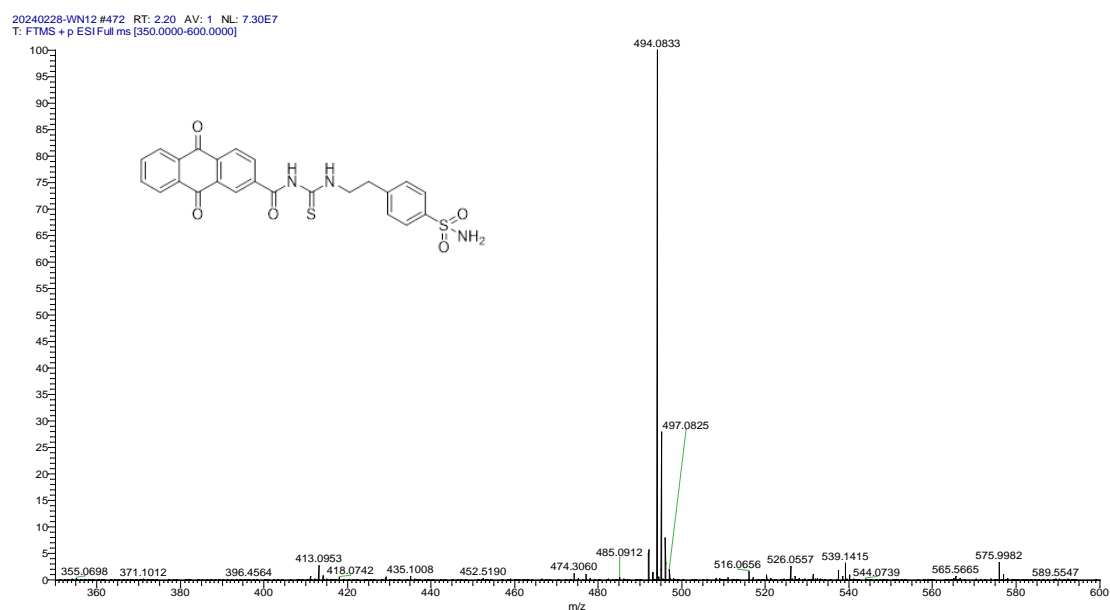

Data S9. <sup>1</sup>H-NMR, <sup>13</sup>C-NMR and HRMS data of compound 5i



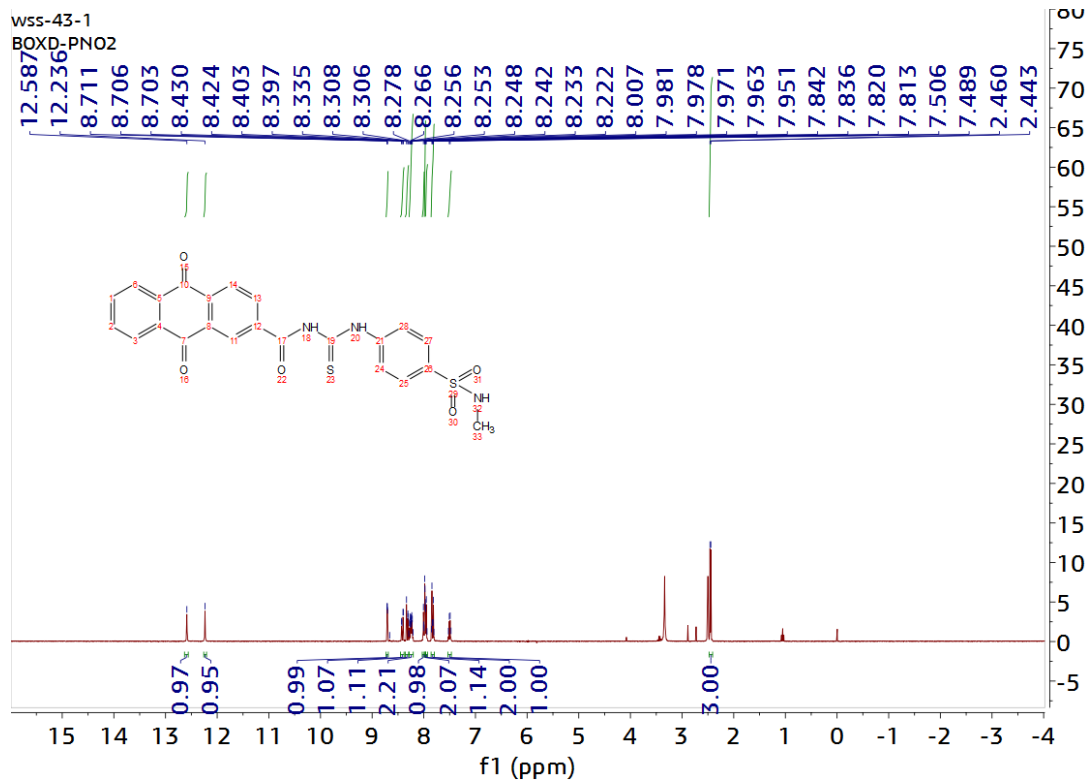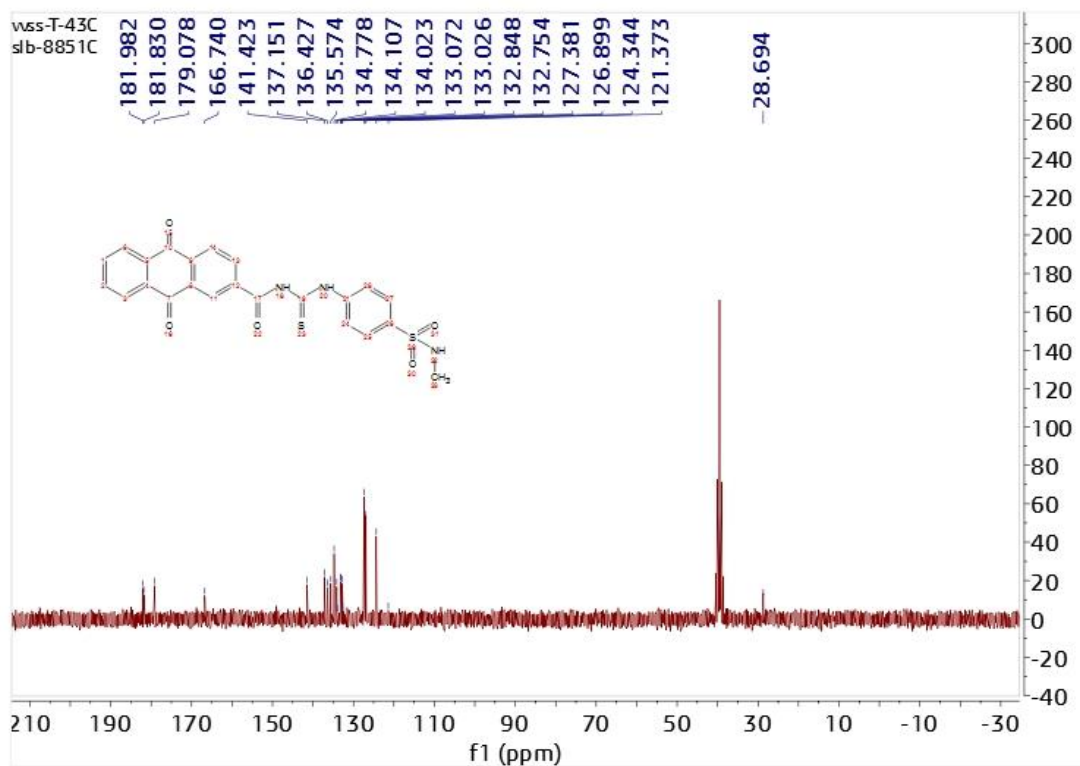

20240228-WN43 #518 RT: 2.41 AV: 1 NL: 2.13E7  
T: FTMS +p ESI Full ms [350.0000-600.0000]

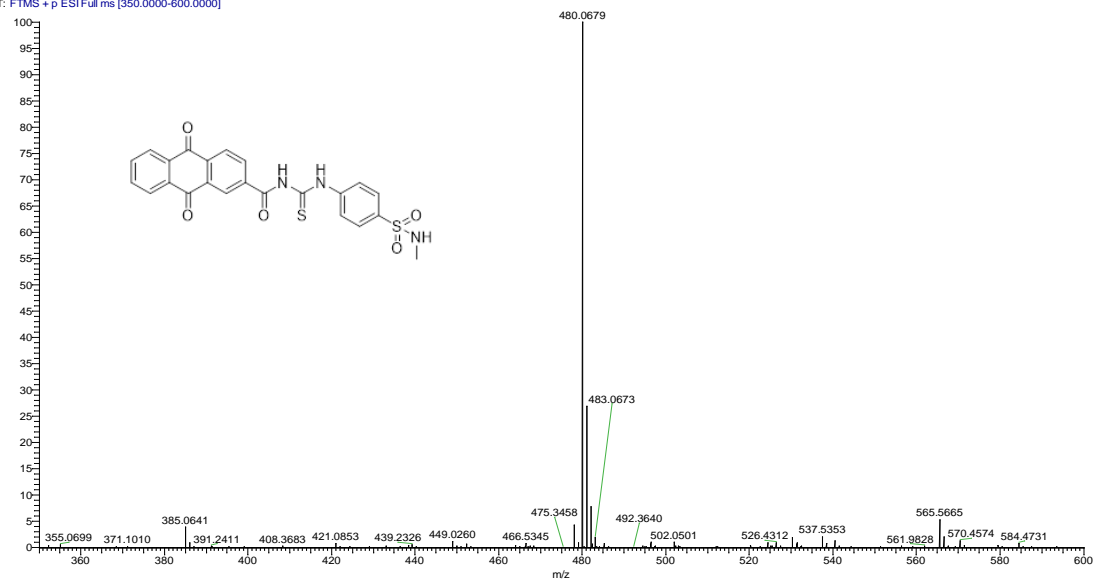

Data S10.  $^1\text{H}$ -NMR,  $^{13}\text{C}$ -NMR and HRMS data of compound 5j

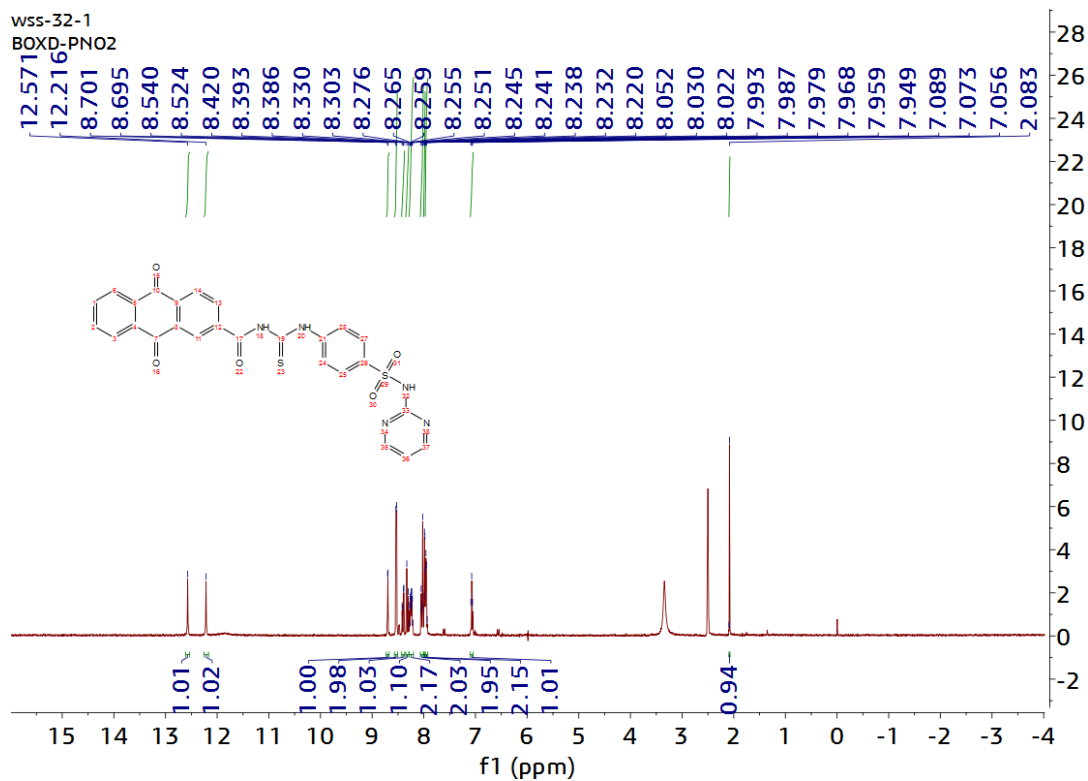

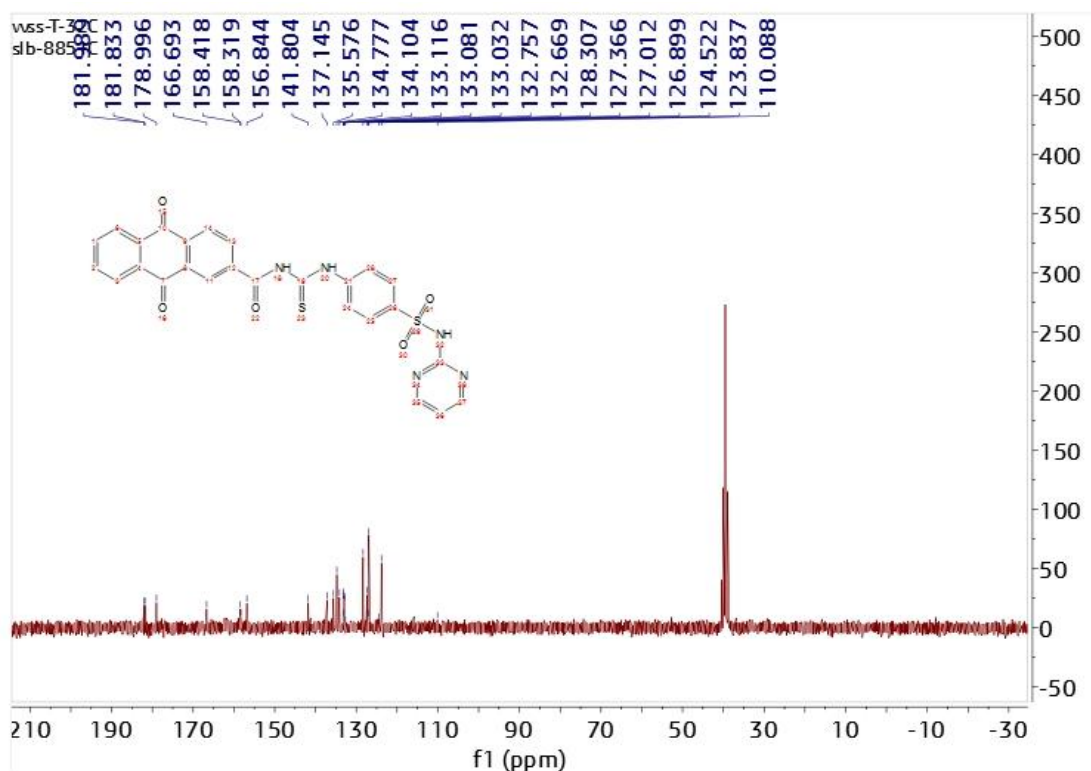

20240228-WN32 #486 RT: 2.26 AV: 1 NL: 3.92E7  
 T: FTMS + p ESI Full ms [350.0000-600.0000]

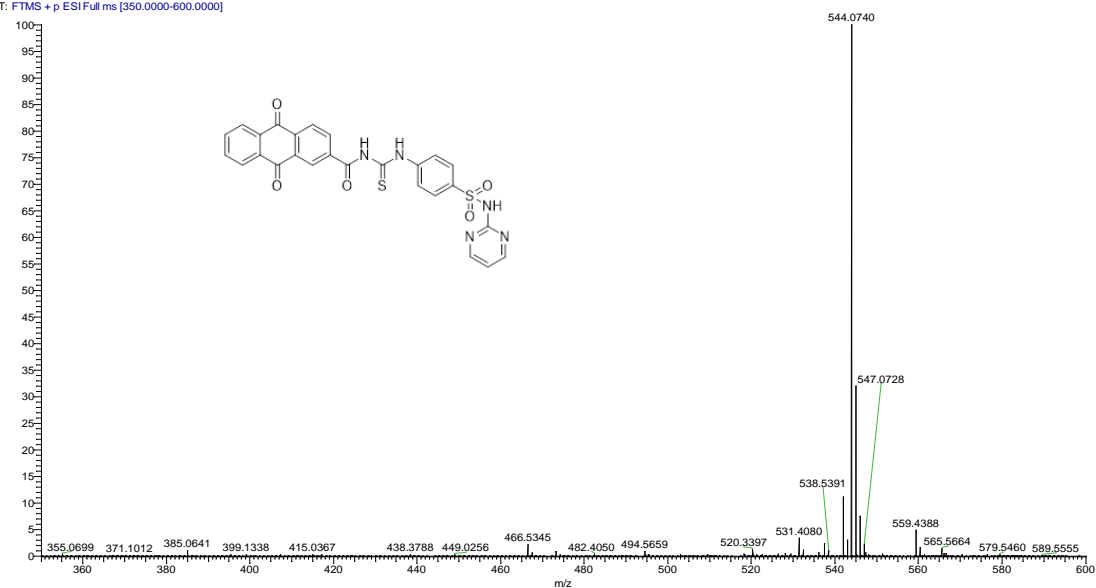

Data S11. <sup>1</sup>H-NMR, <sup>13</sup>C-NMR and HRMS data of compound 5k

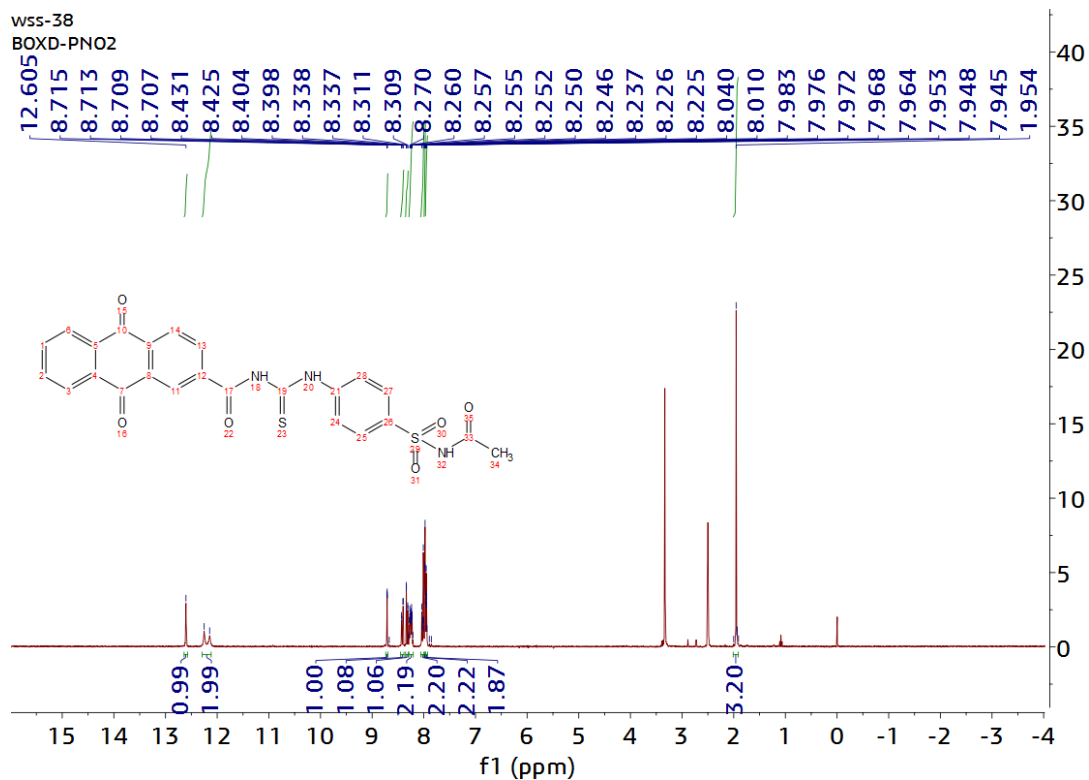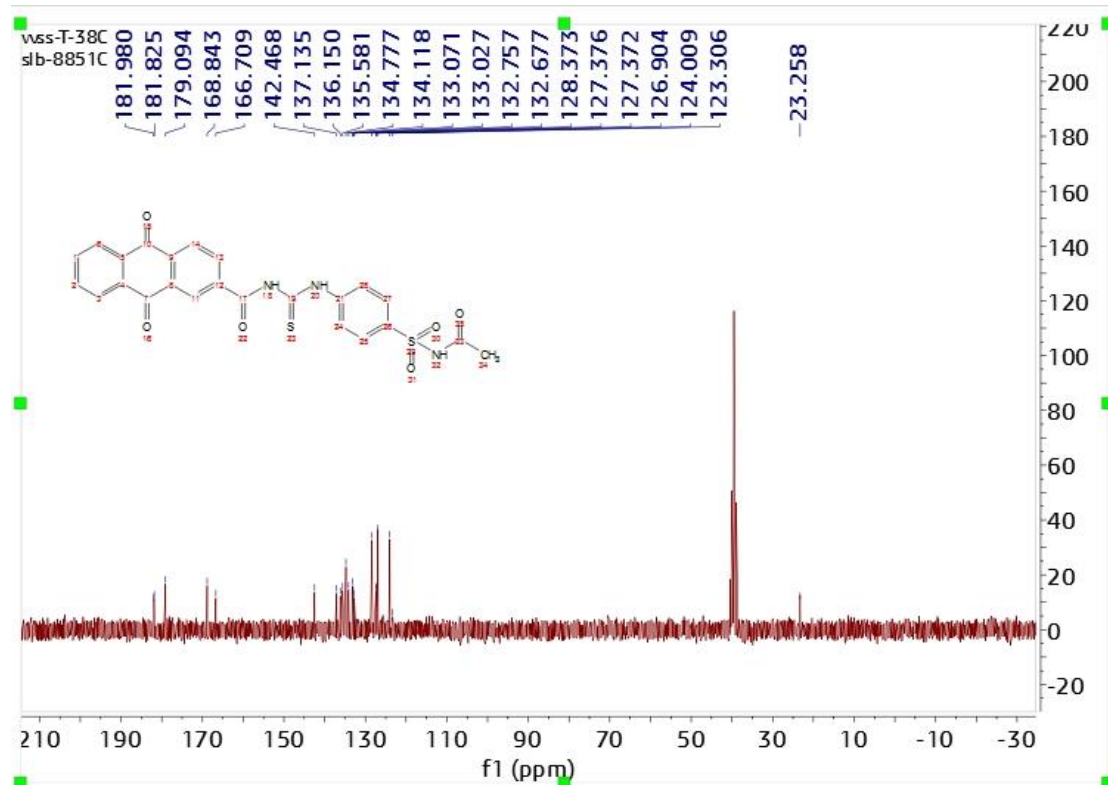

20240228-WN39 #510 RT: 2.36 AV: 1 NL: 3.44E7  
T: FTMS + p ESI Full ms [350.0000-600.0000]

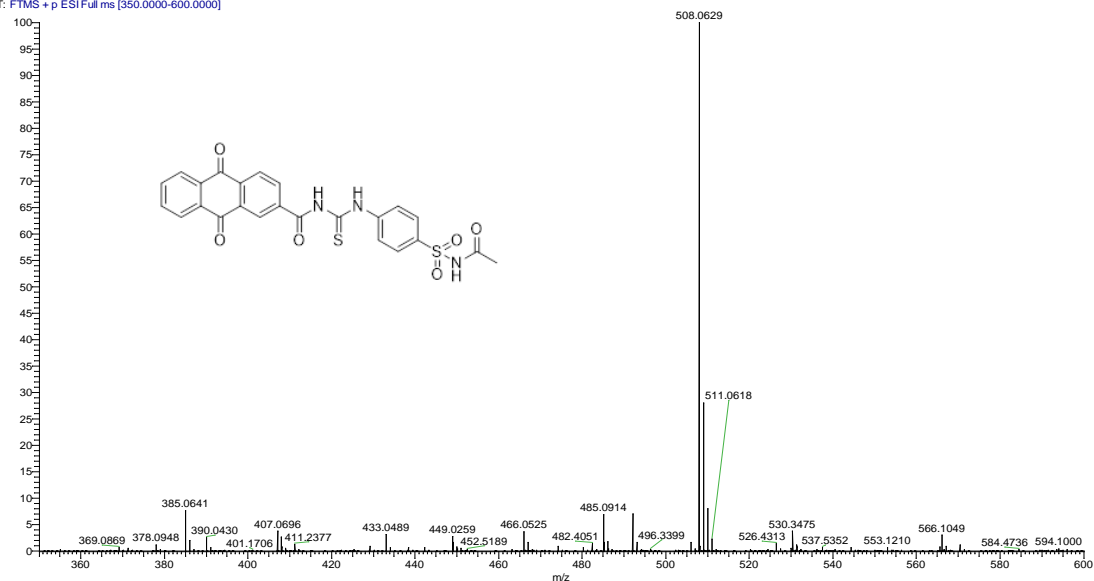

Data S12. <sup>1</sup>H-NMR, <sup>13</sup>C-NMR and HRMS data of compound 5l

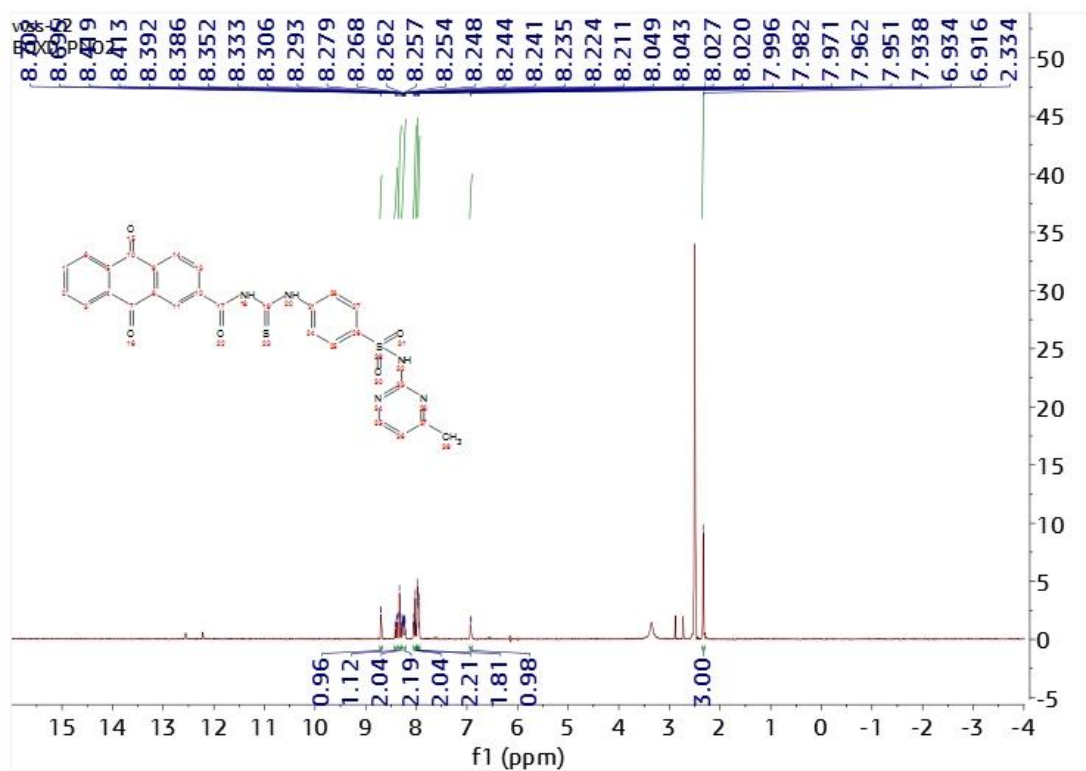

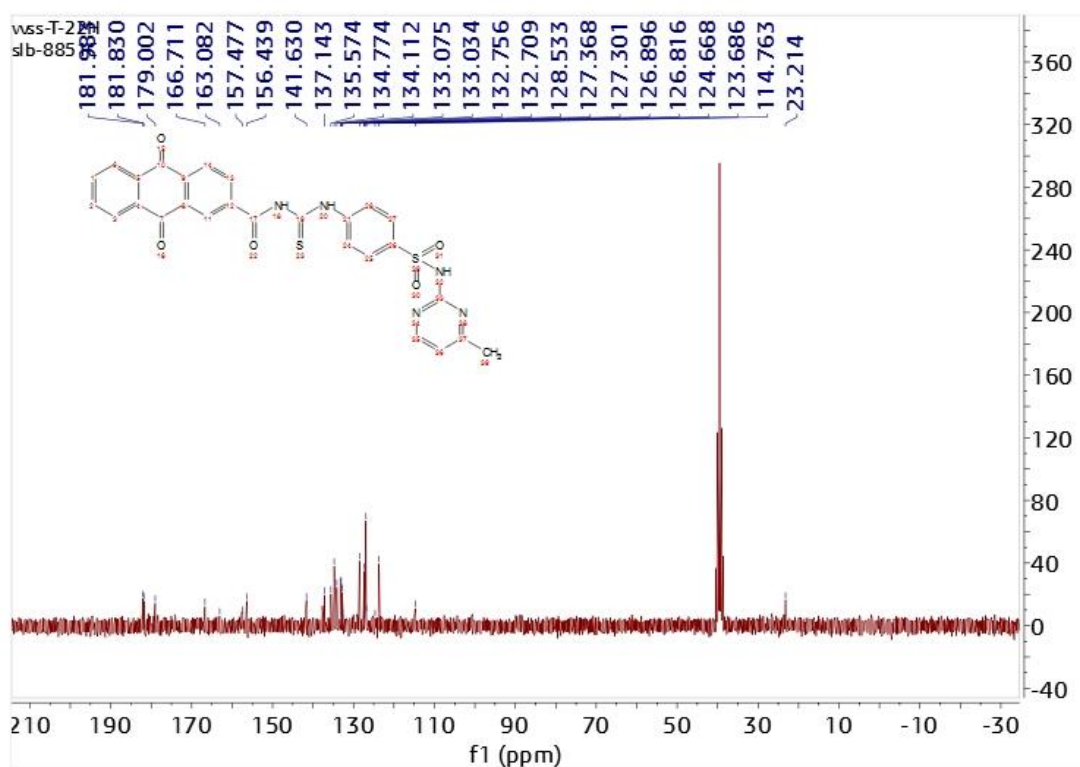

20240228-WN22 #481 RT: 2.23 AV: 1 NL: 4.03E8  
T: FTMS - p ESI Full ms [350.0000-600.0000]

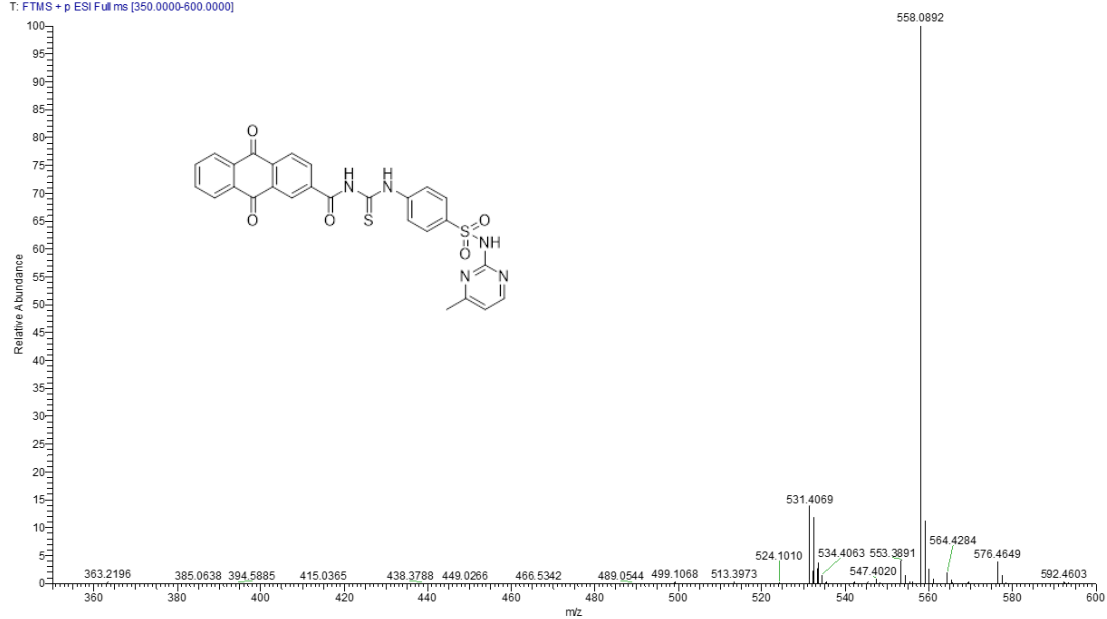

Data S13.  $^1\text{H}$ -NMR,  $^{13}\text{C}$ -NMR and HRMS data of compound 5m

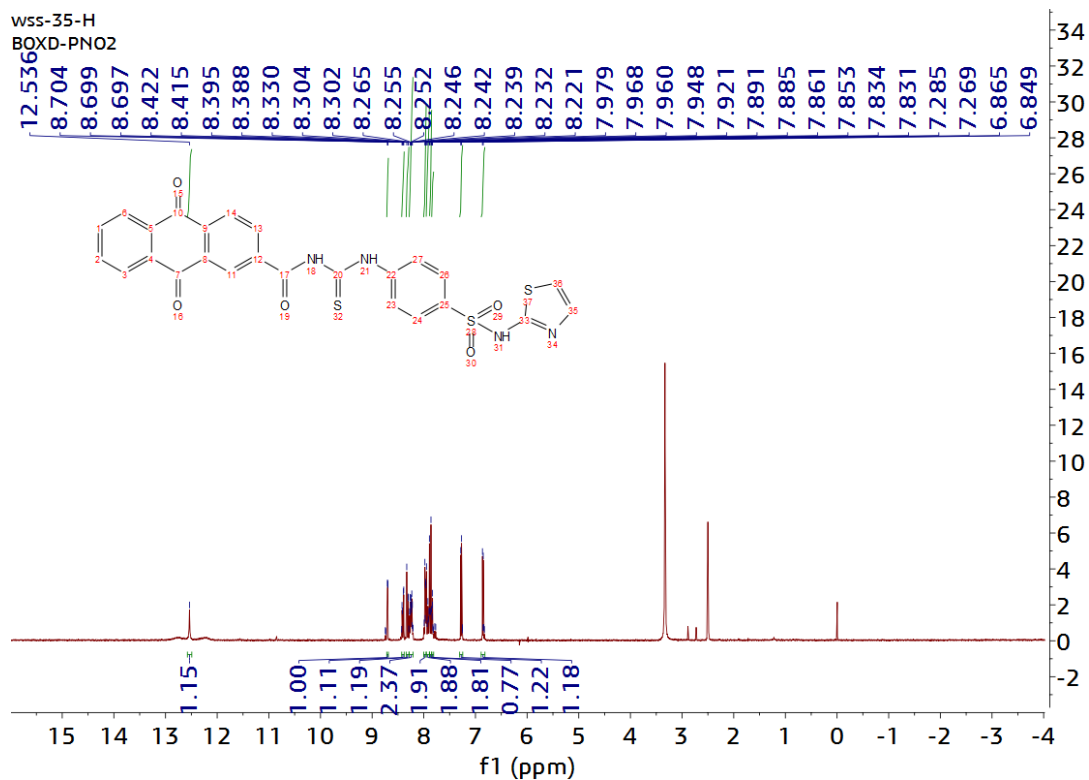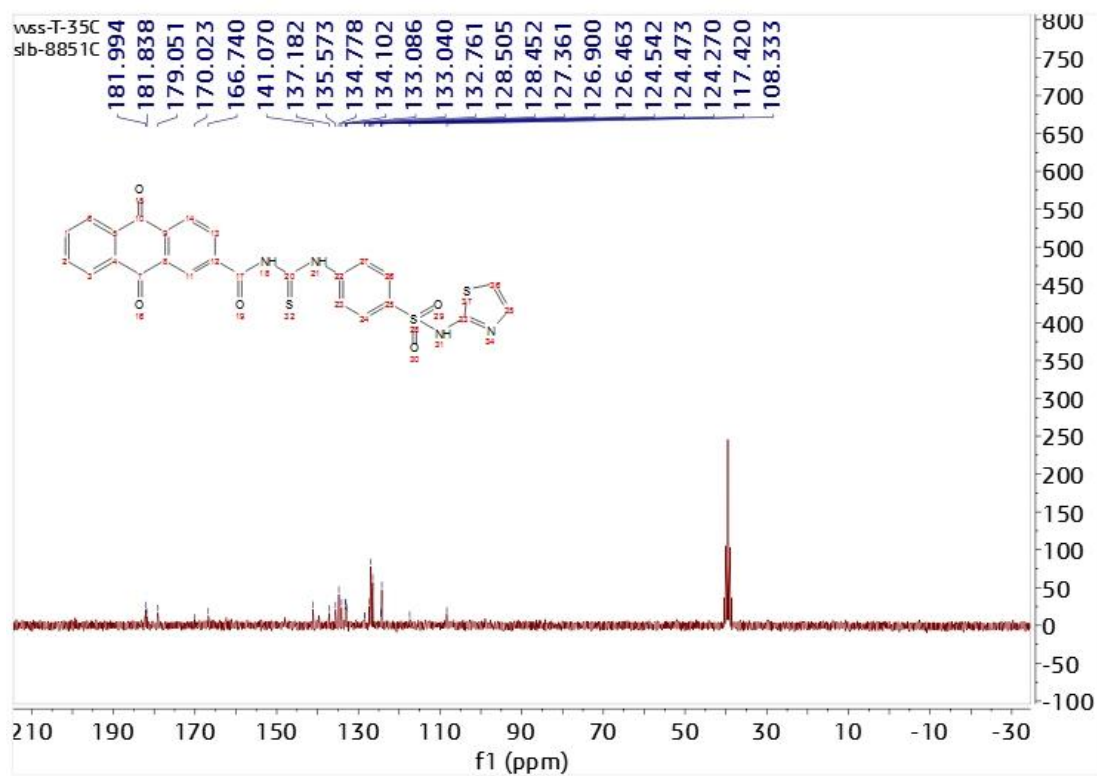

20240228-WN35 #615 RT: 2.82 AV: 1 NL: 1.28E8  
T: FTMS + p ESI Full ms [350.0000-600.0000]

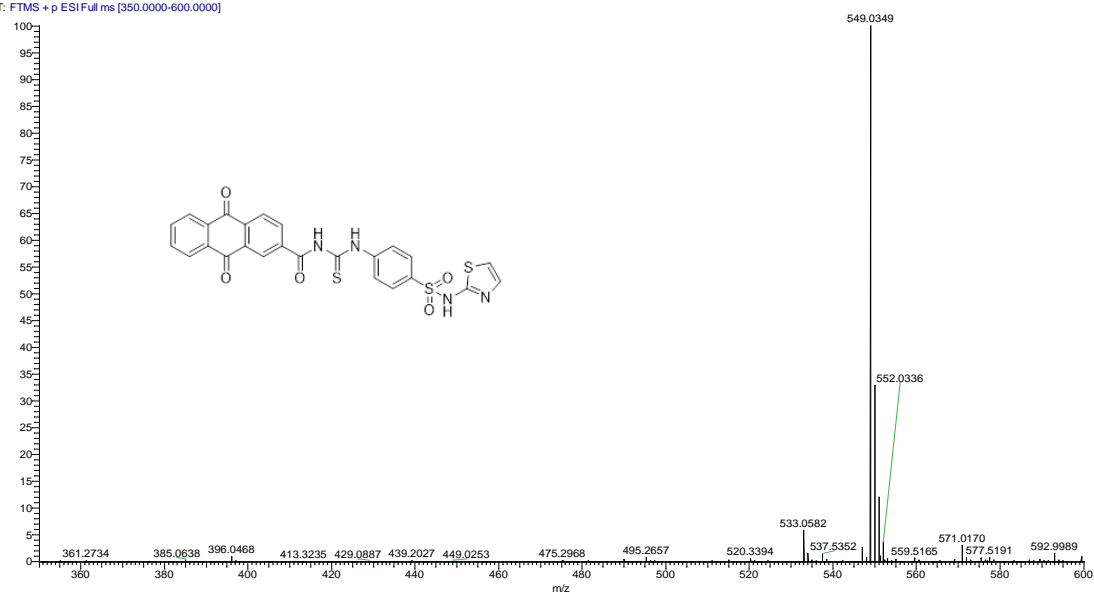

Data S14.  $^1\text{H}$ -NMR,  $^{13}\text{C}$ -NMR and HRMS data of compound 5n

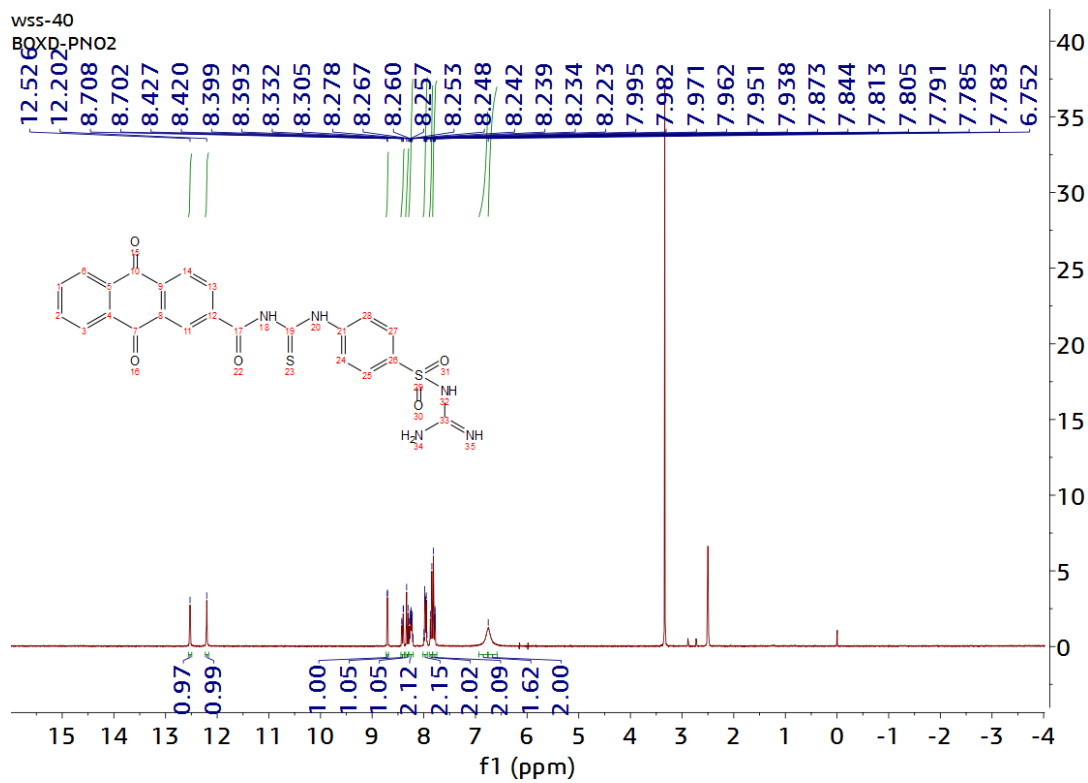



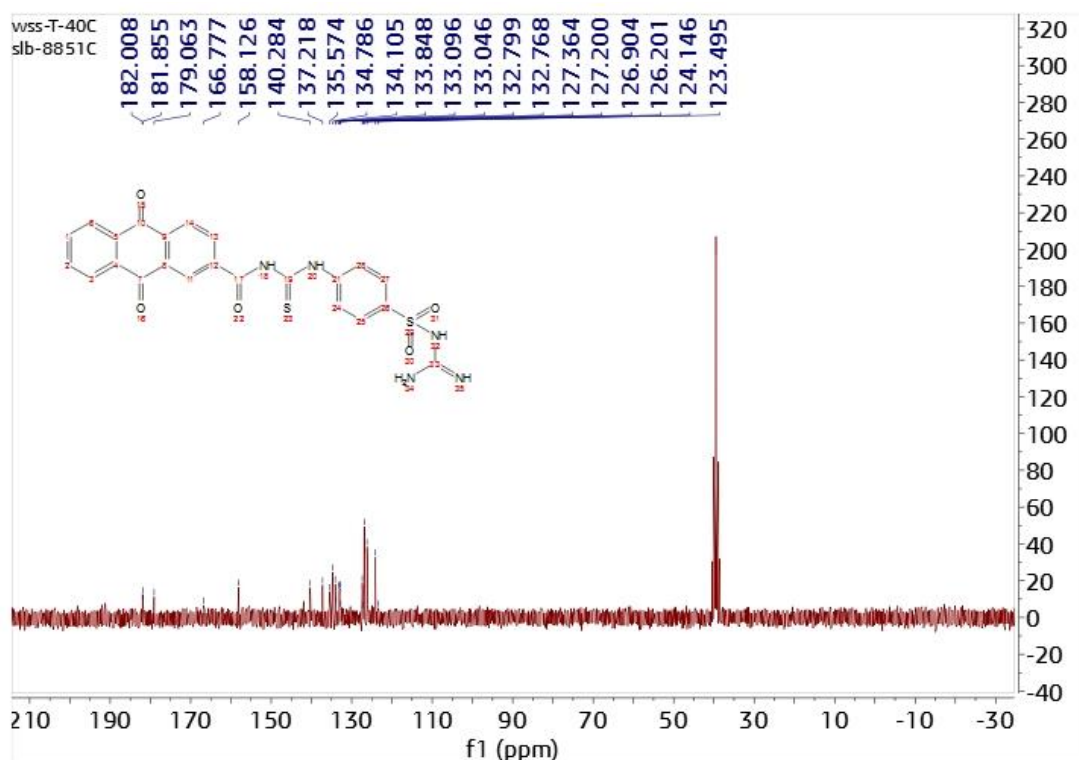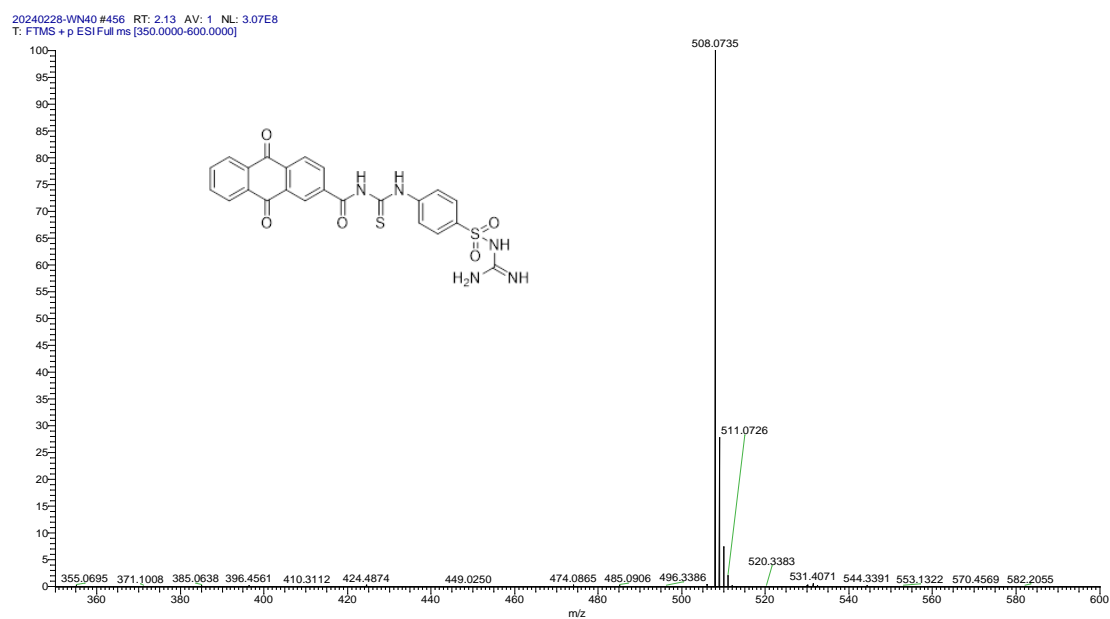

Data S15.  $^1\text{H}$ -NMR,  $^{13}\text{C}$ -NMR and HRMS data of compound 6a

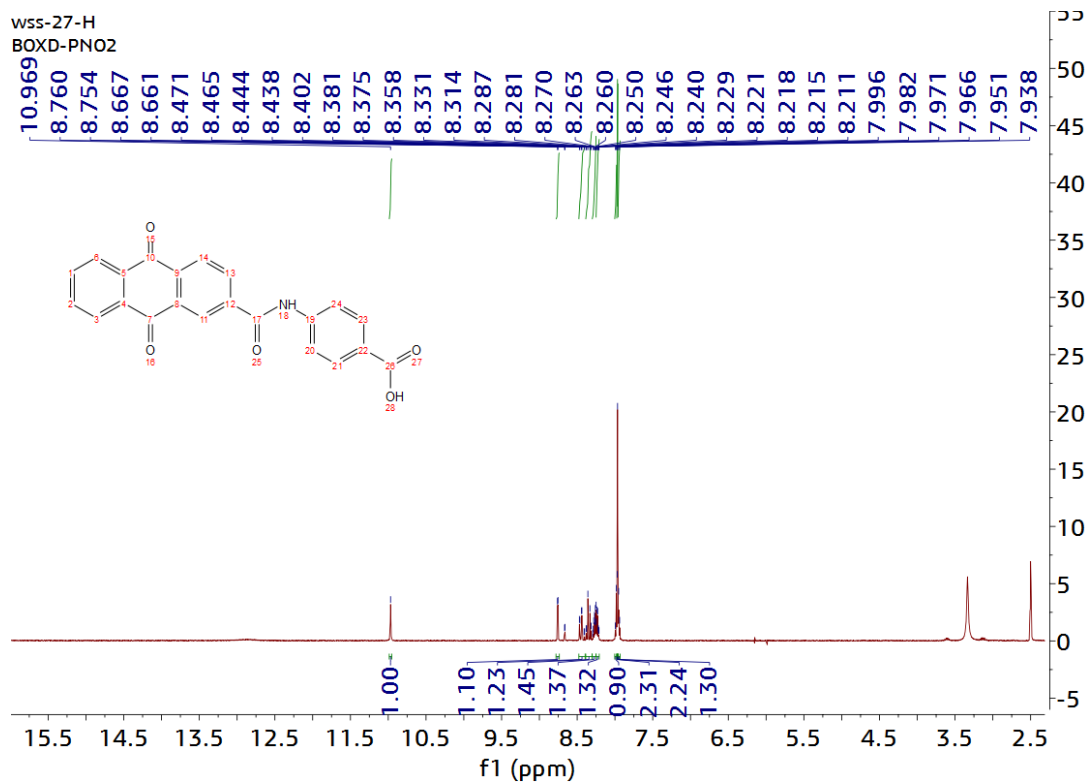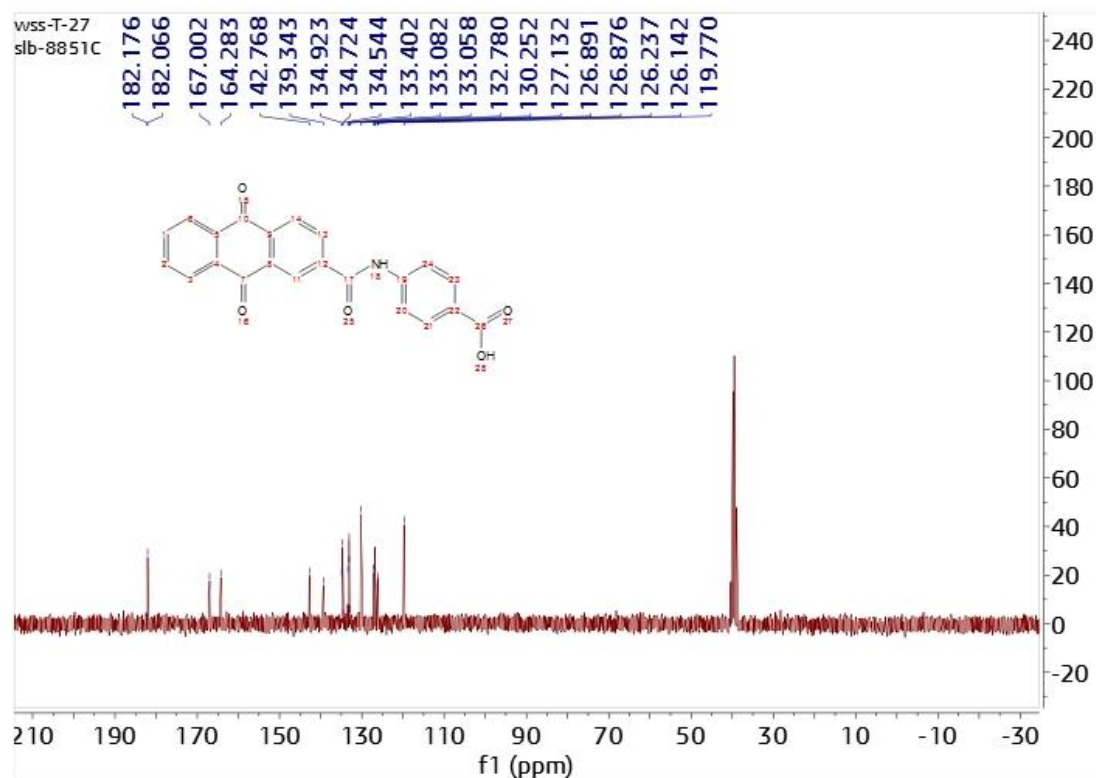

20240228-WN27 #491 RT: 2.28 AV: 1 NL: 8.66E7  
T: FTMS +p ESI Full ms [350.0000-600.0000]

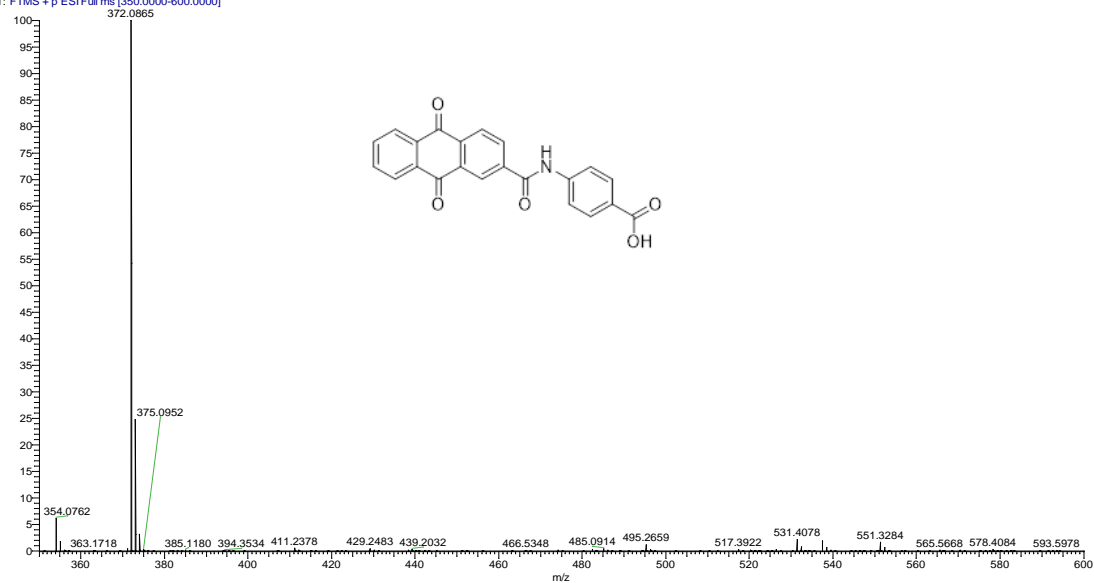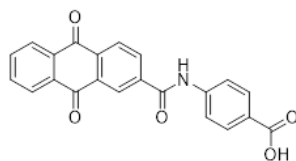

Data S16.  $^1\text{H}$ -NMR,  $^{13}\text{C}$ -NMR and HRMS data of compound 6b

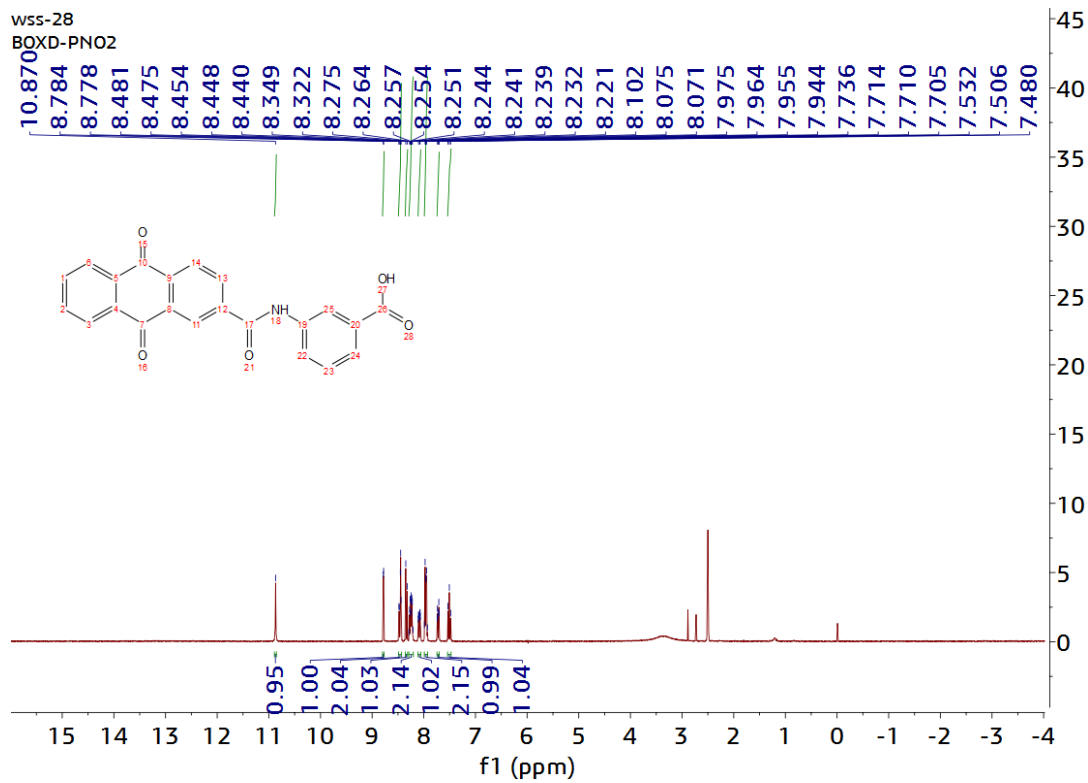

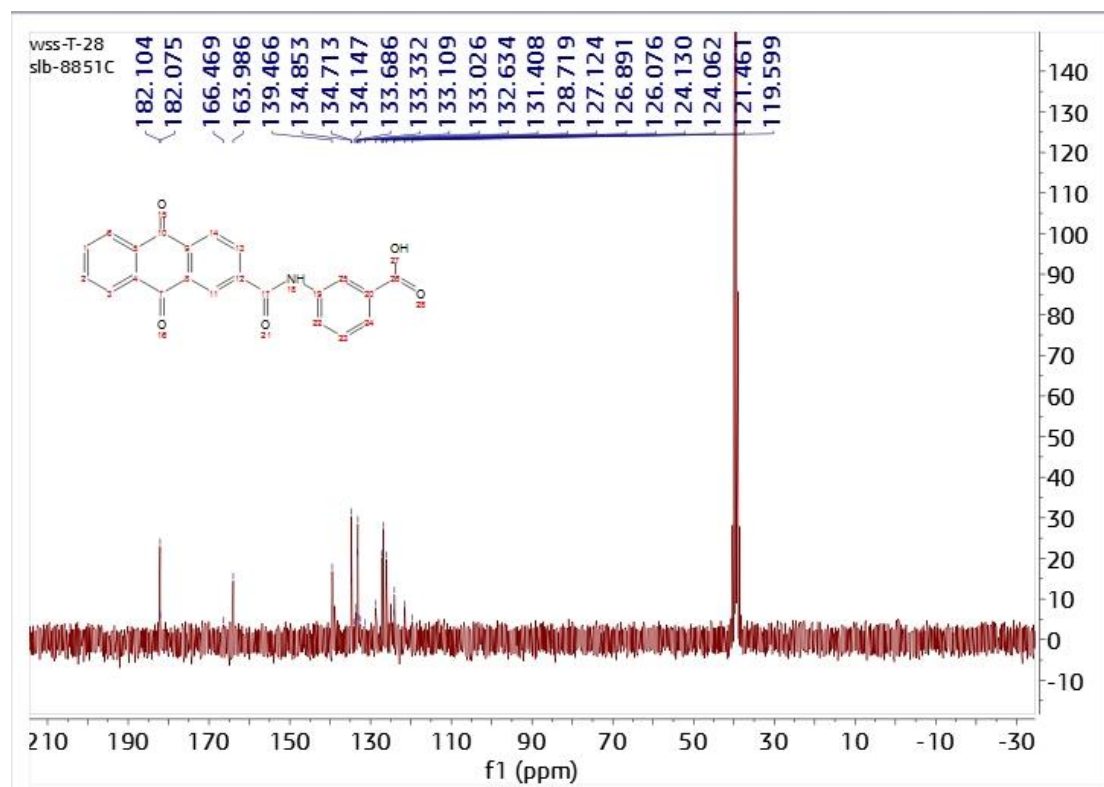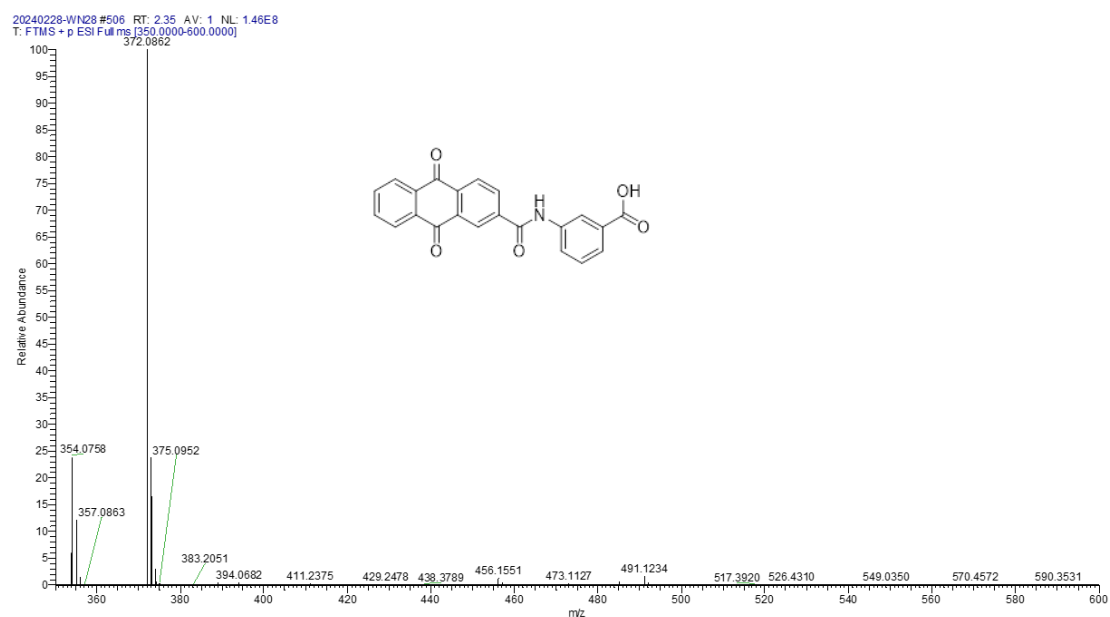

Data S17.  $^1\text{H}$ -NMR,  $^{13}\text{C}$ -NMR and HRMS data of compound 6c

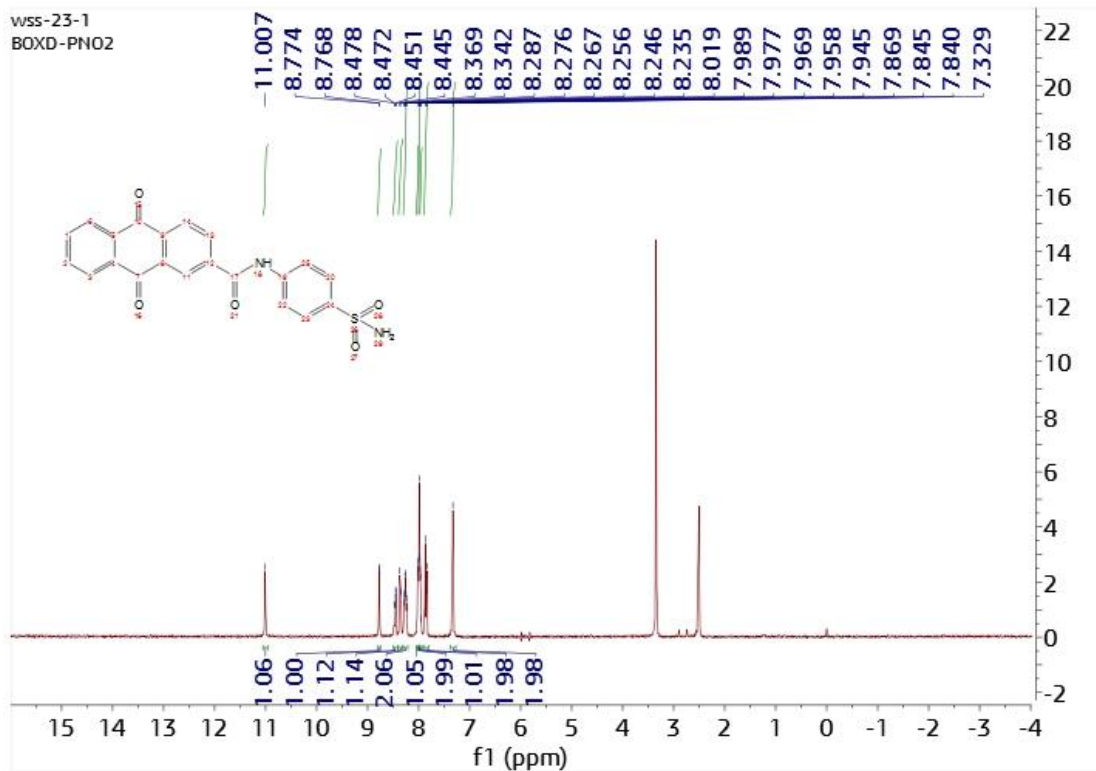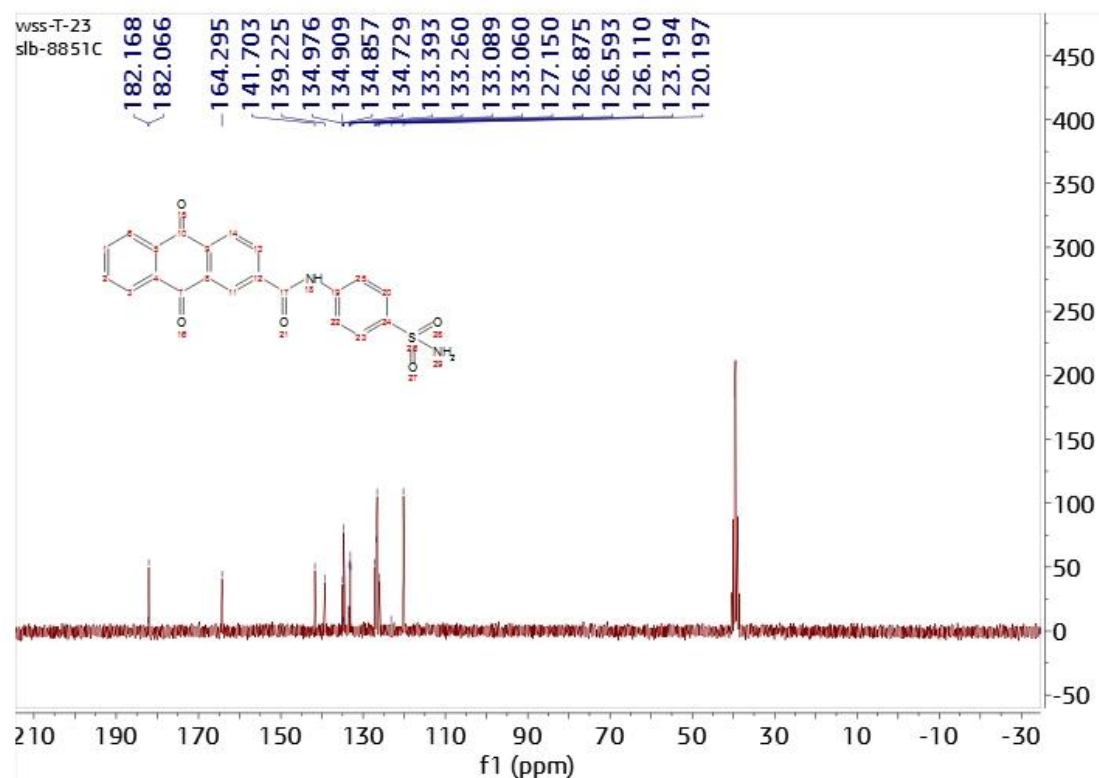

20240228-WN23 #485 RT: 2.26 AV: 1 NL: 1.71E8  
T: FTMS +p ESI Full ms [350.0000-600.0000]

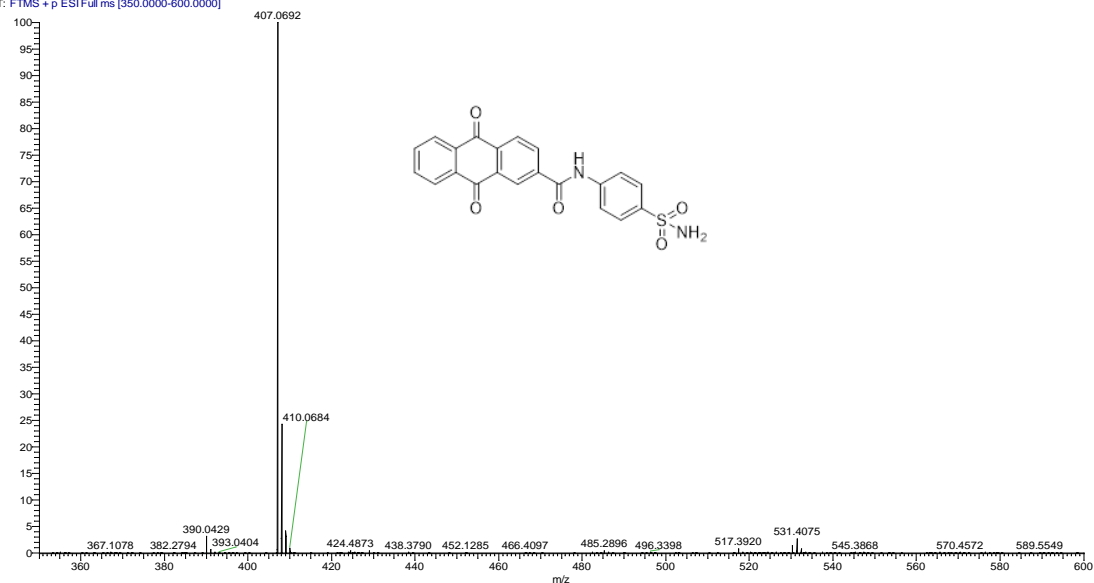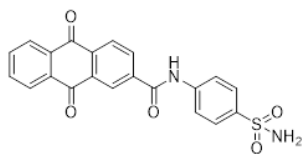

Data S18. <sup>1</sup>H-NMR, <sup>13</sup>C-NMR and HRMS data of compound 6d

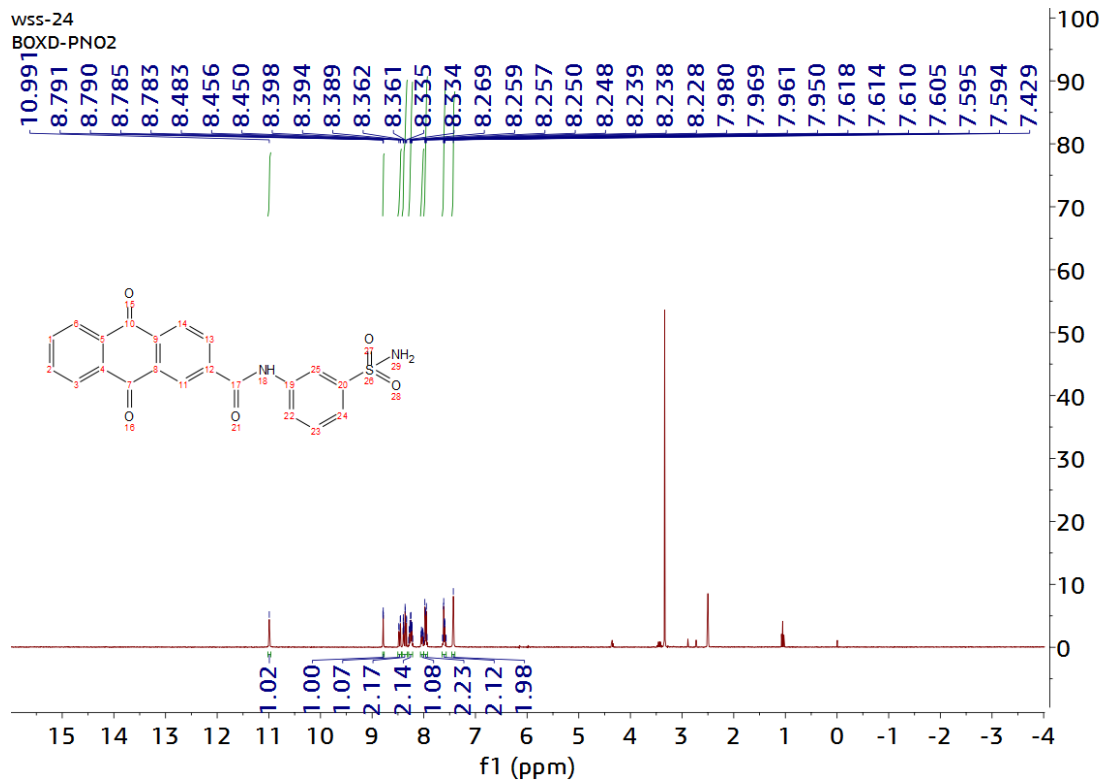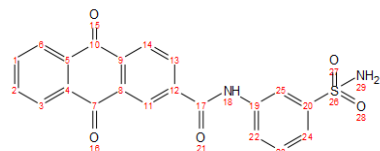

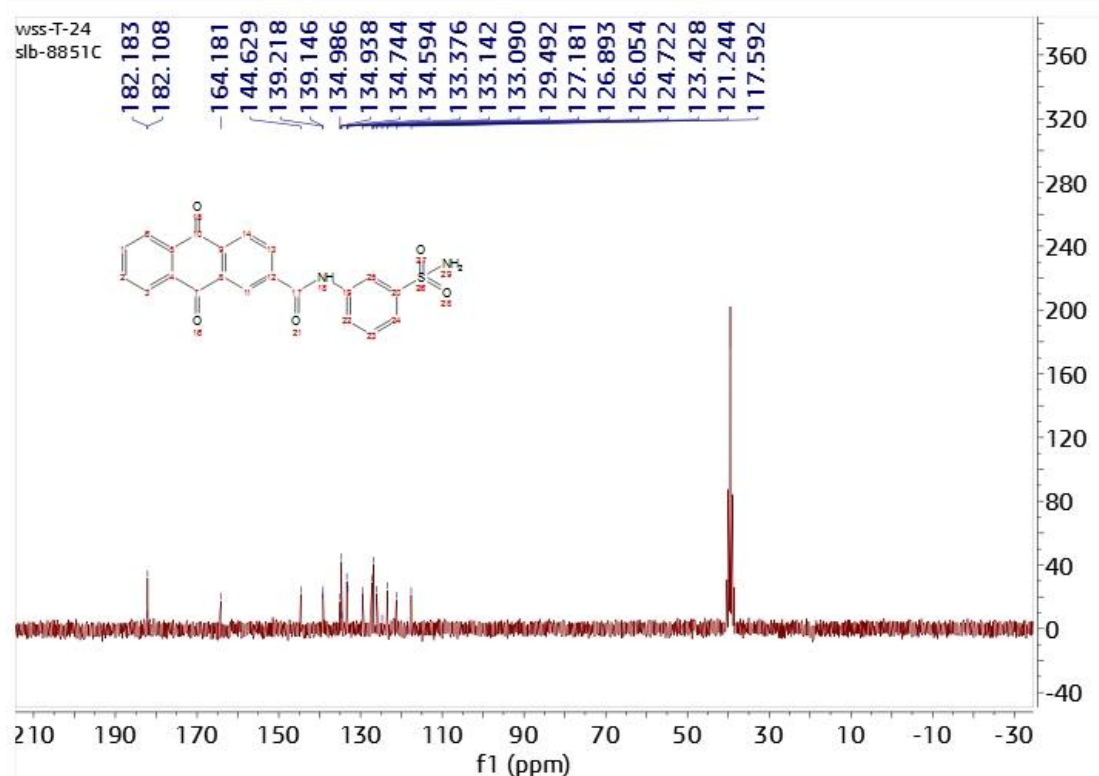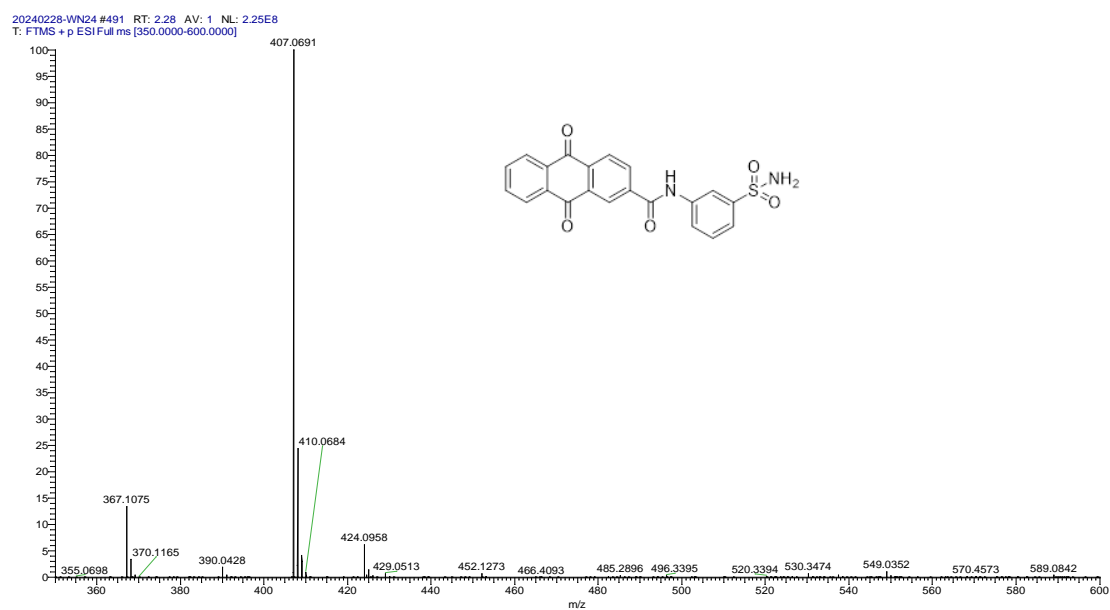

Data S19. <sup>1</sup>H-NMR, <sup>13</sup>C-NMR and HRMS data of compound 6e

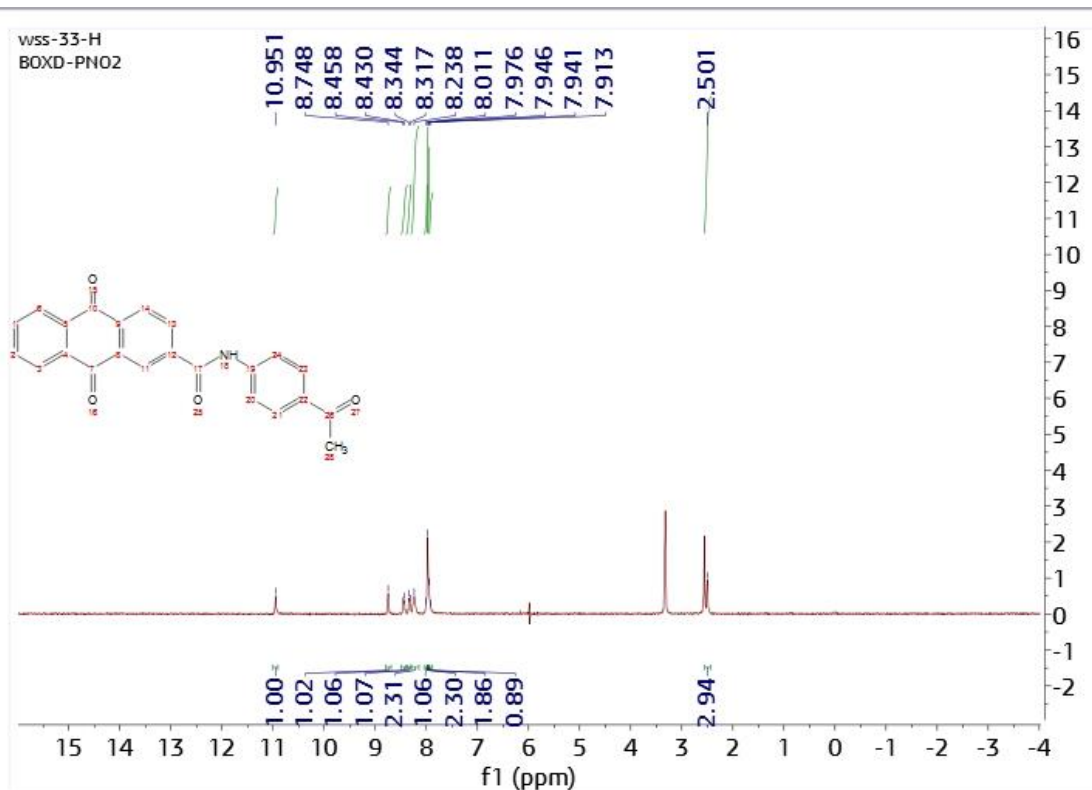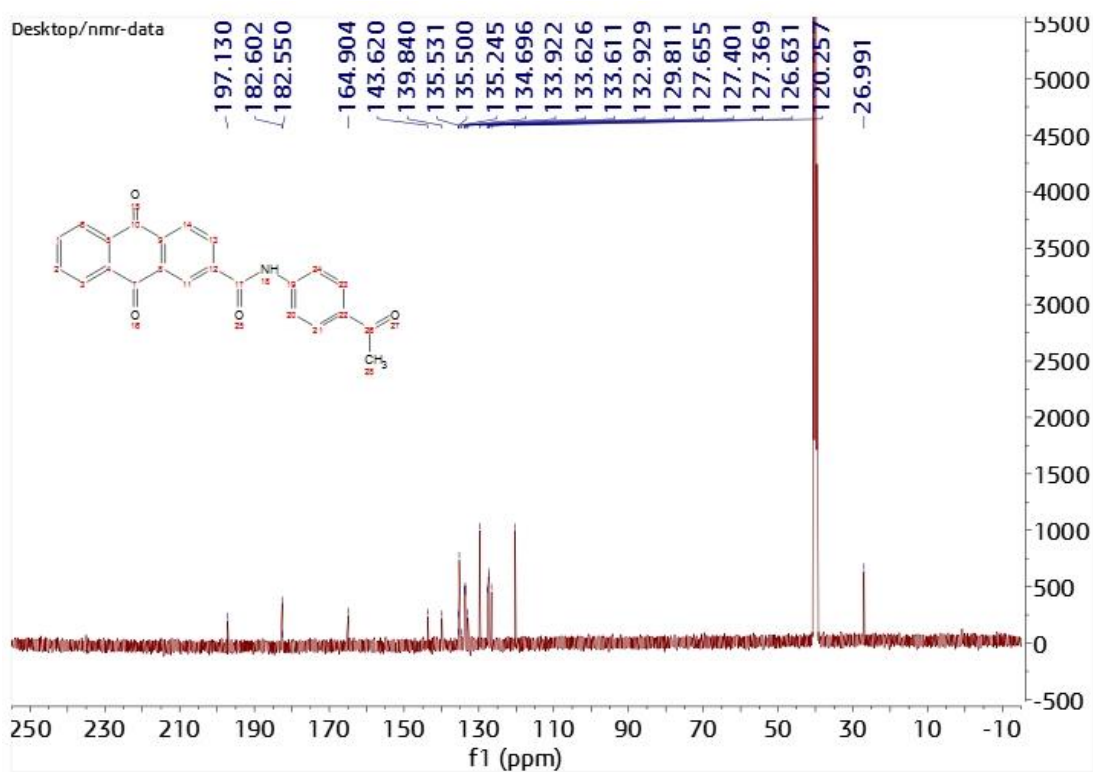



20240228-WN33 #549 RT: 2.55 AV: 1 NL: 1.11E8  
T: FTMS +p ESI Full ms [350.0000-600.0000]

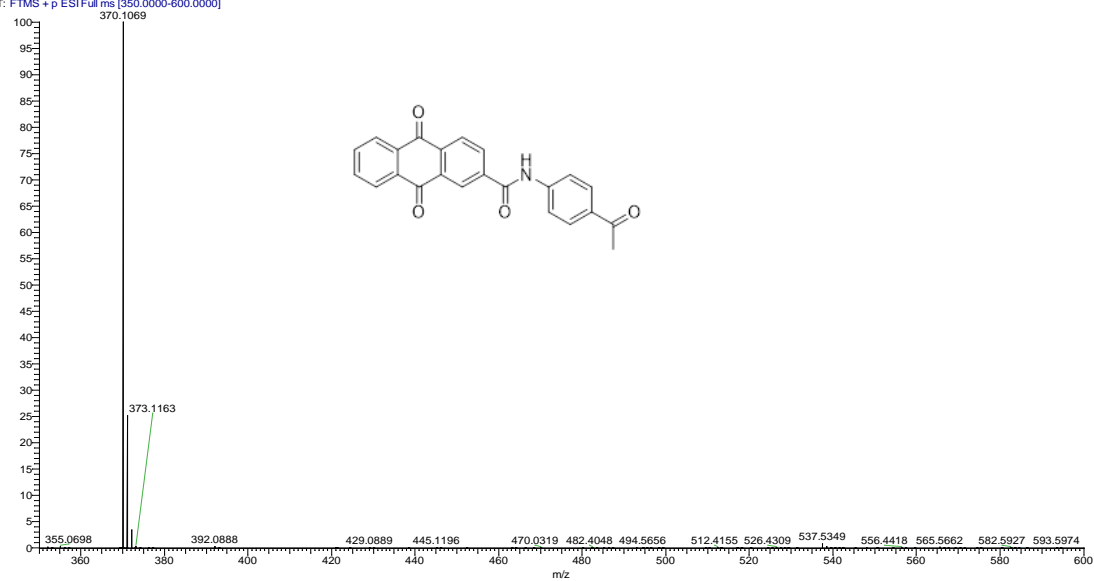

Data S20. <sup>1</sup>H-NMR, <sup>13</sup>C-NMR and HRMS data of compound 6h

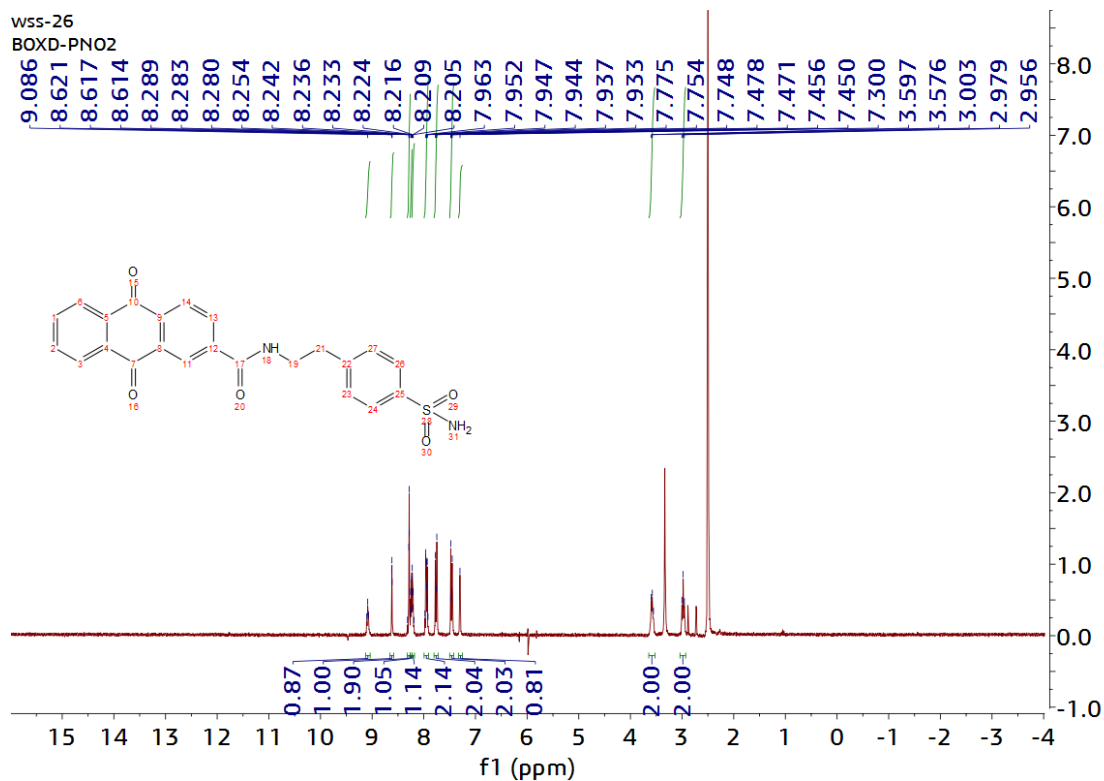

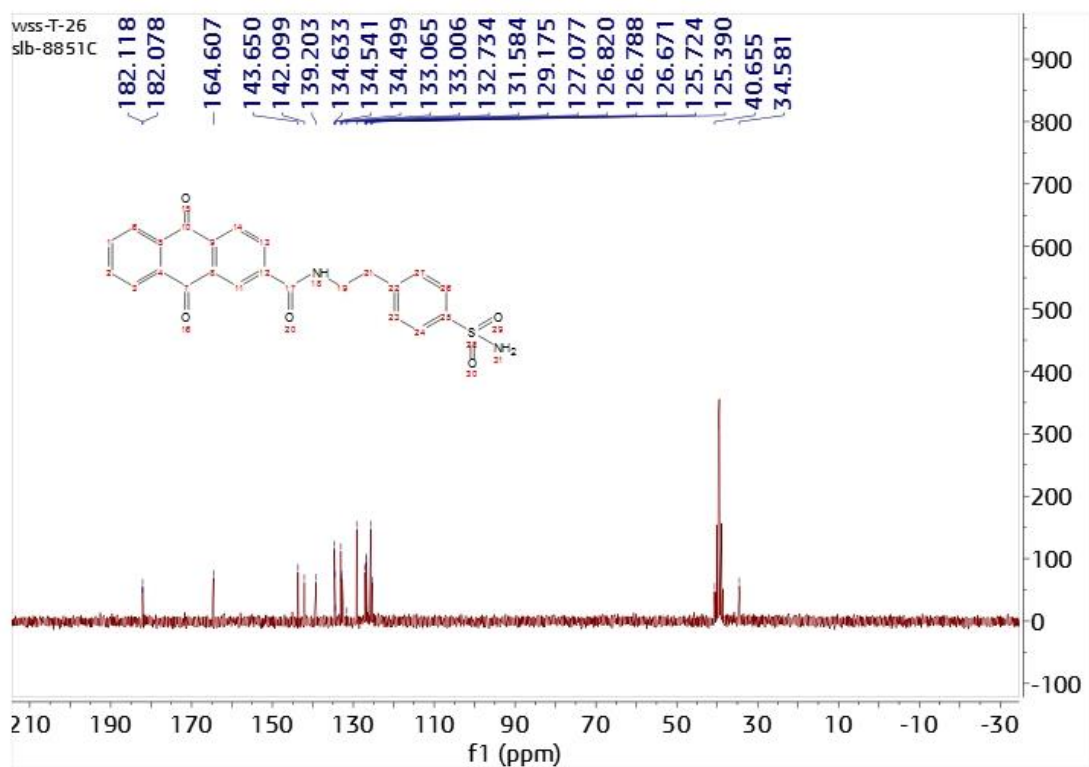

20240226-WN26 #456 RT: 2.13 AV: 1 NL: 1.20E8  
T: FTMS + p ESI Full ms [350.0000-600.0000]

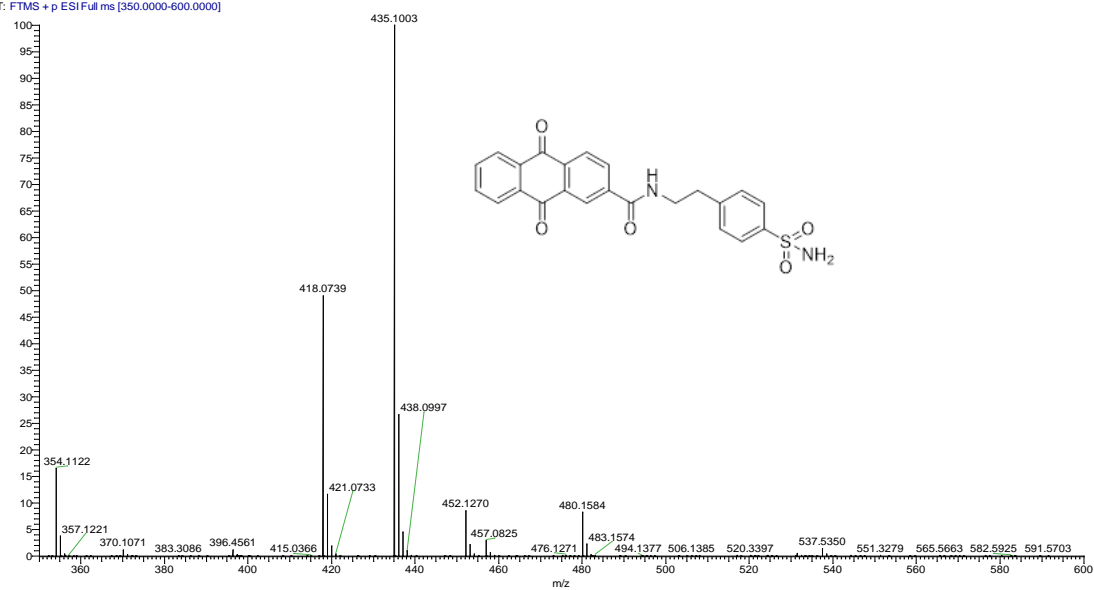

Data S21. <sup>1</sup>H-NMR, <sup>13</sup>C-NMR and HRMS data of compound 6i

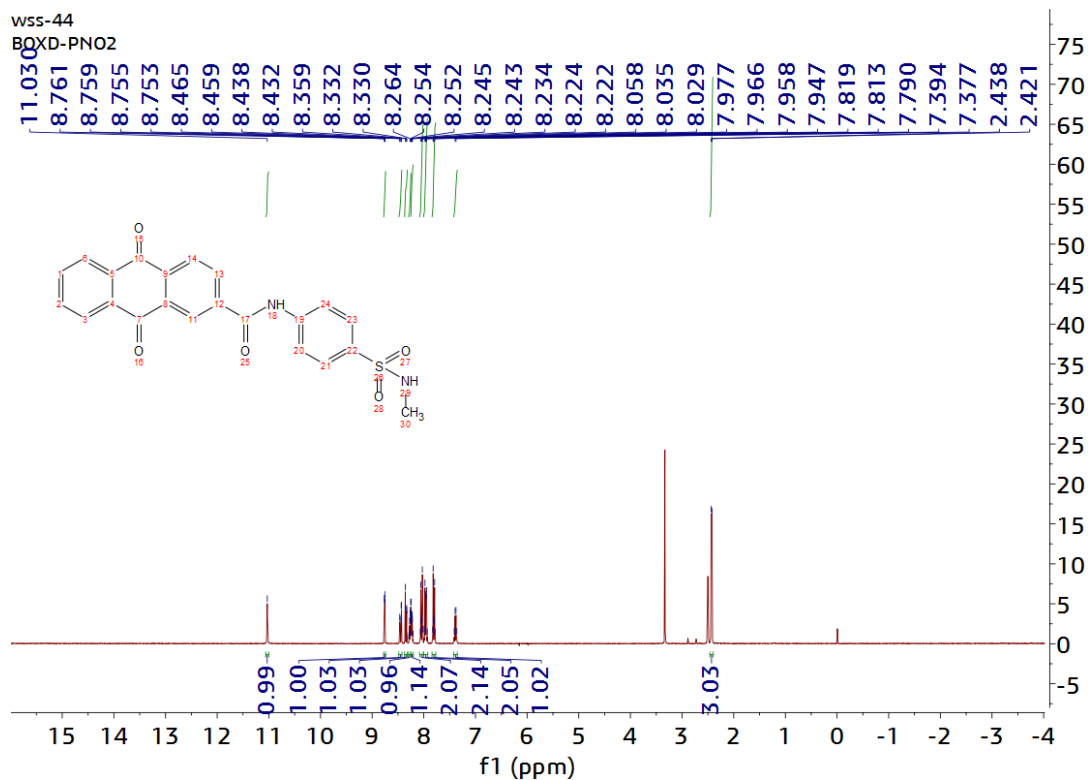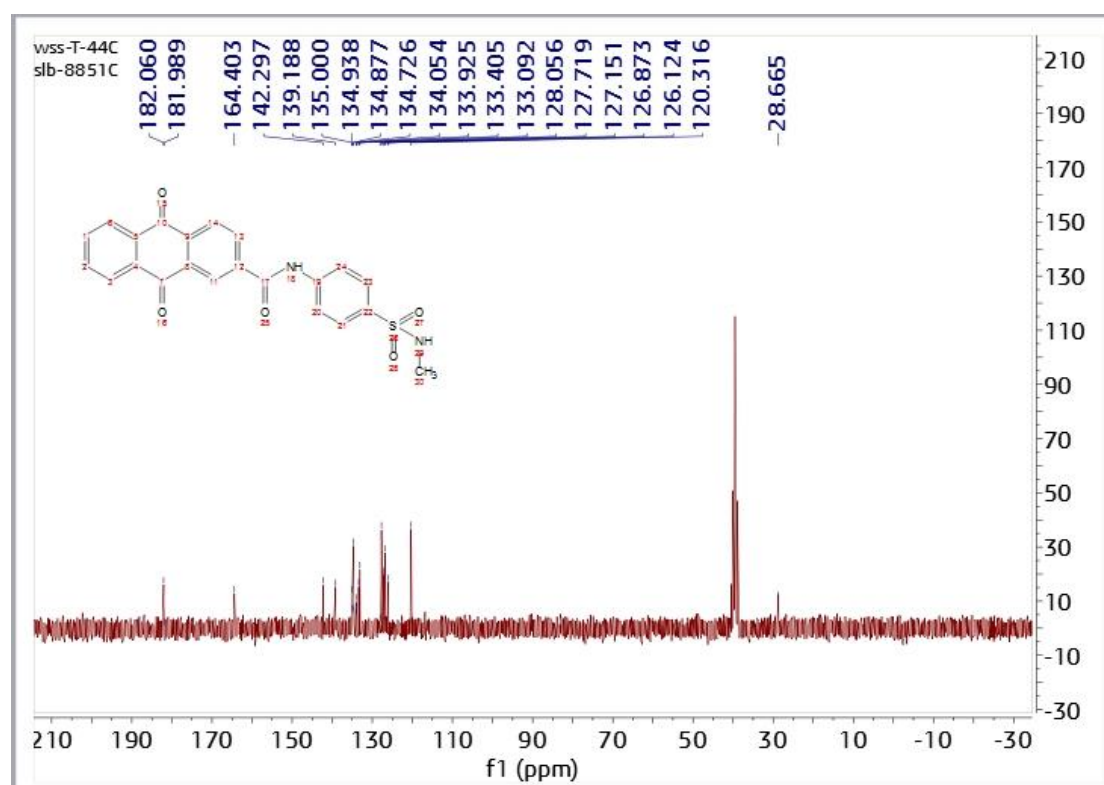

20240228-WN44 #531 RT: 2.47 AV: 1 NL: 1.24E8  
T: FTMS + p ESI Full ms [350.0000-600.0000]

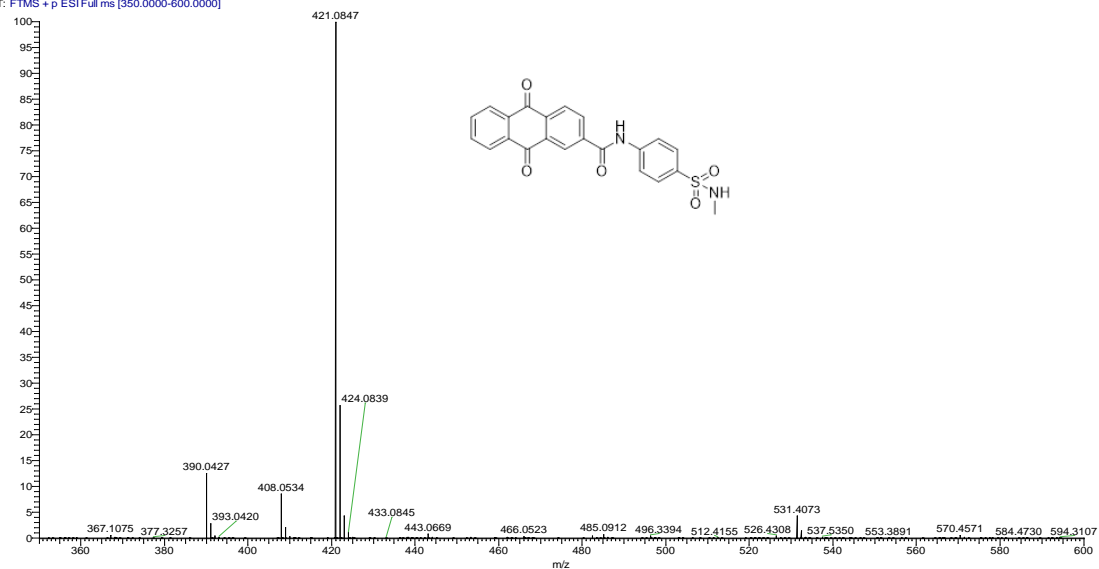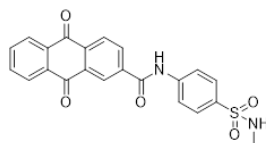

Data S22. <sup>1</sup>H-NMR, <sup>13</sup>C-NMR and HRMS data of compound 6j

wss-30

BOXD-PNO2

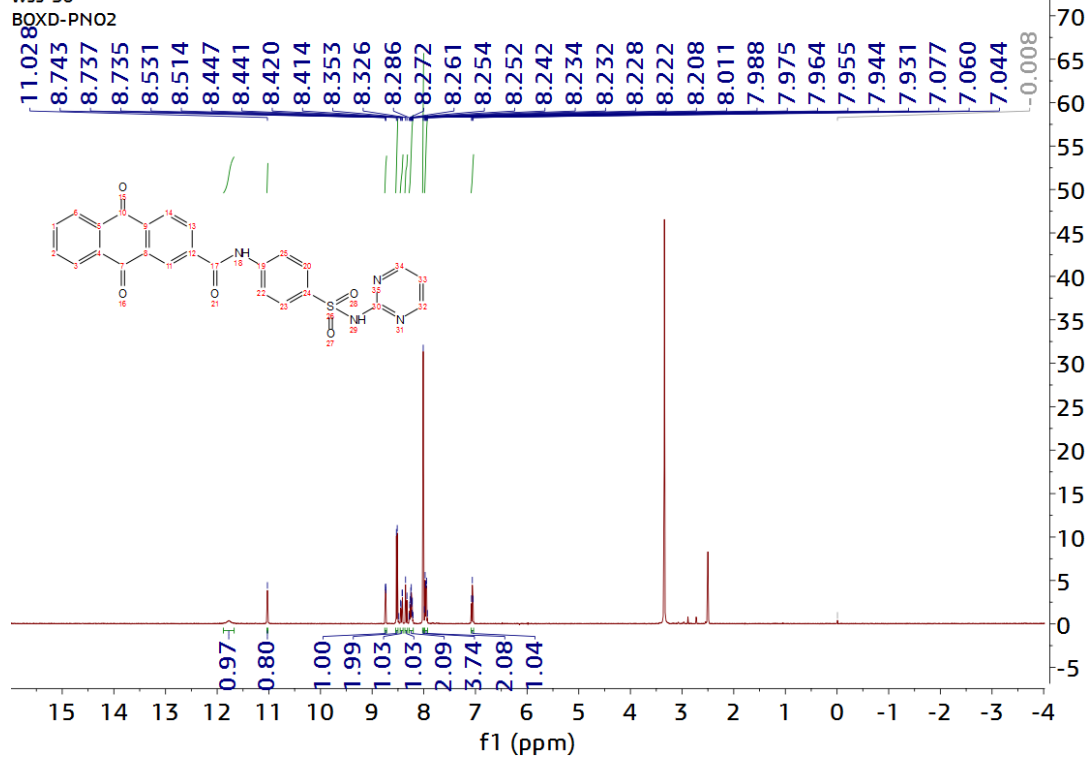

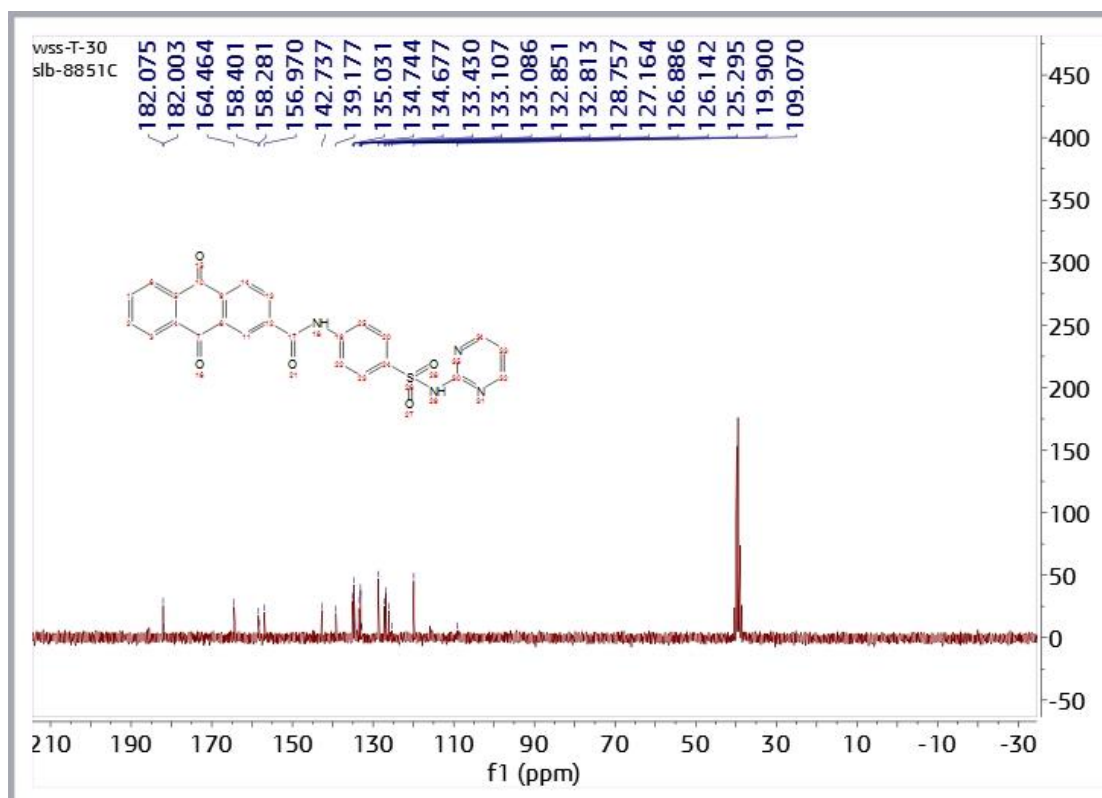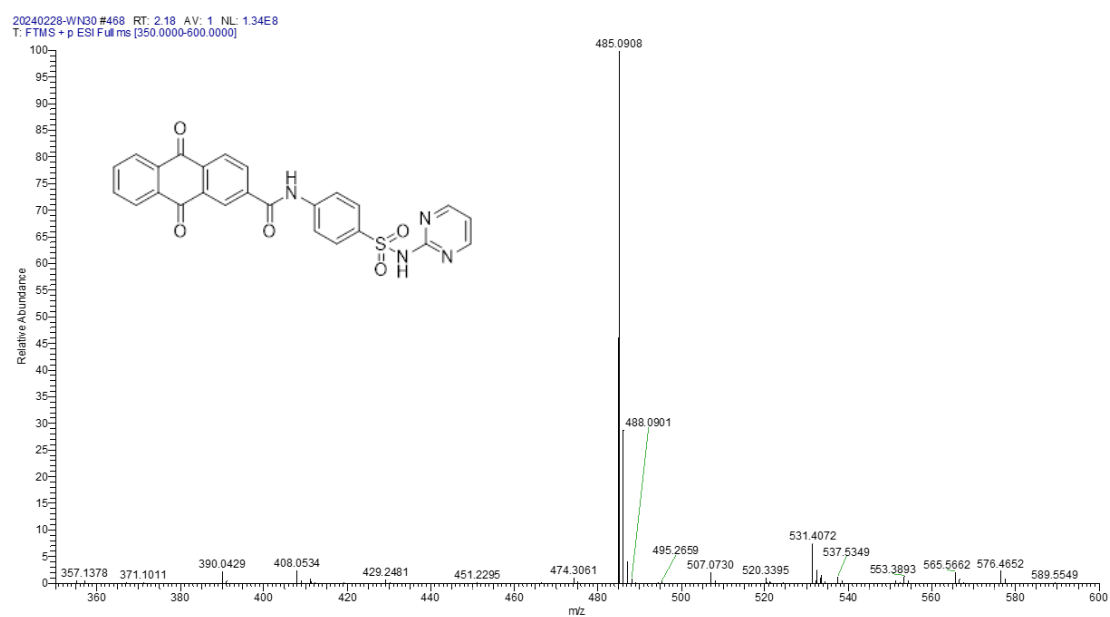

Data S23.  $^1\text{H}$ -NMR,  $^{13}\text{C}$ -NMR and HRMS data of compound 6k

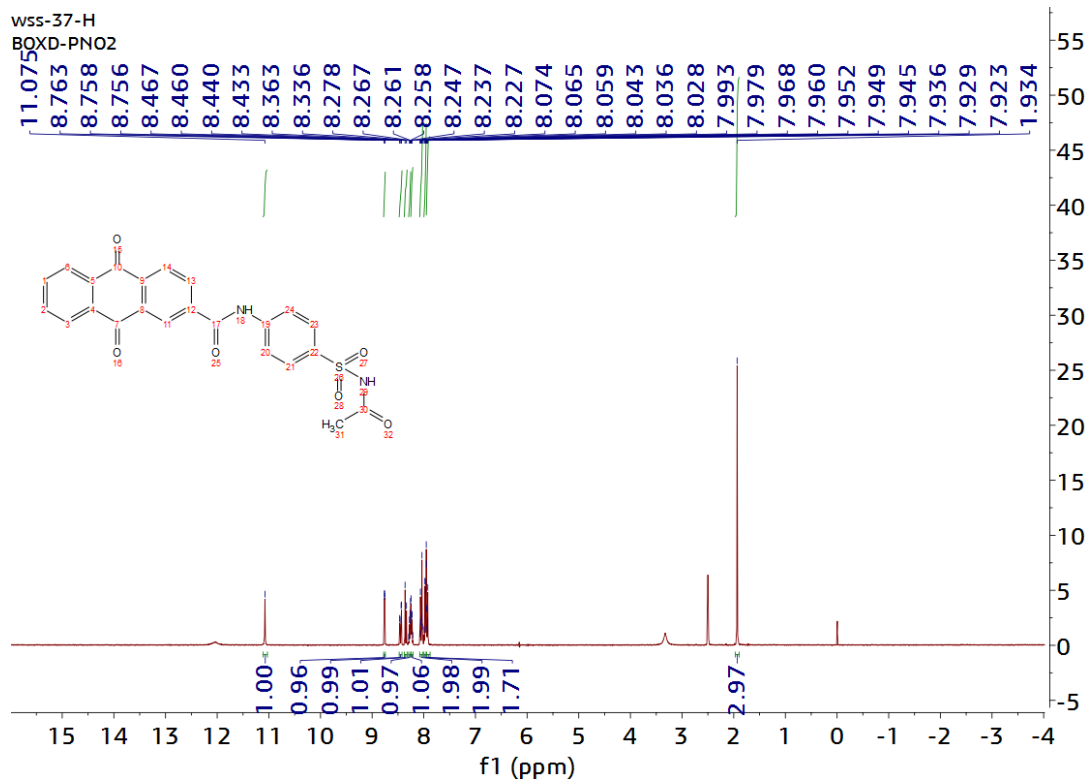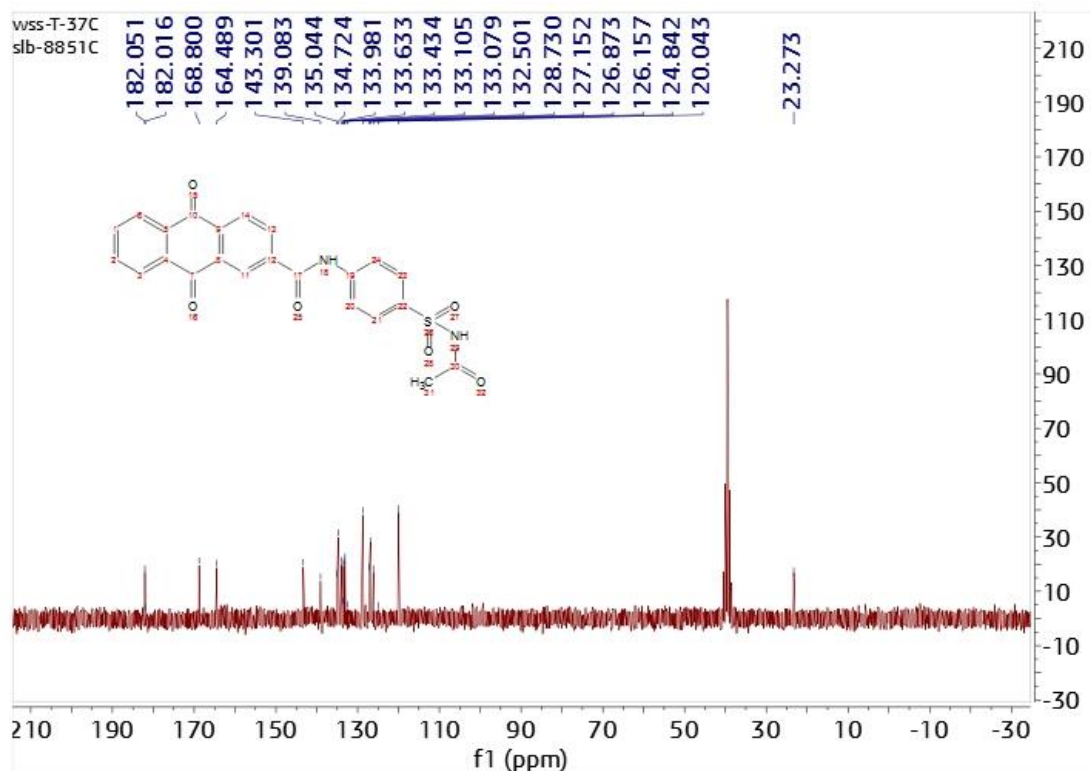

20240228-WN37-pos #497 RT: 2.31 AV: 1 NL: 2.87E7  
T: FTMS + p ESI Full ms [350.0000-600.0000]

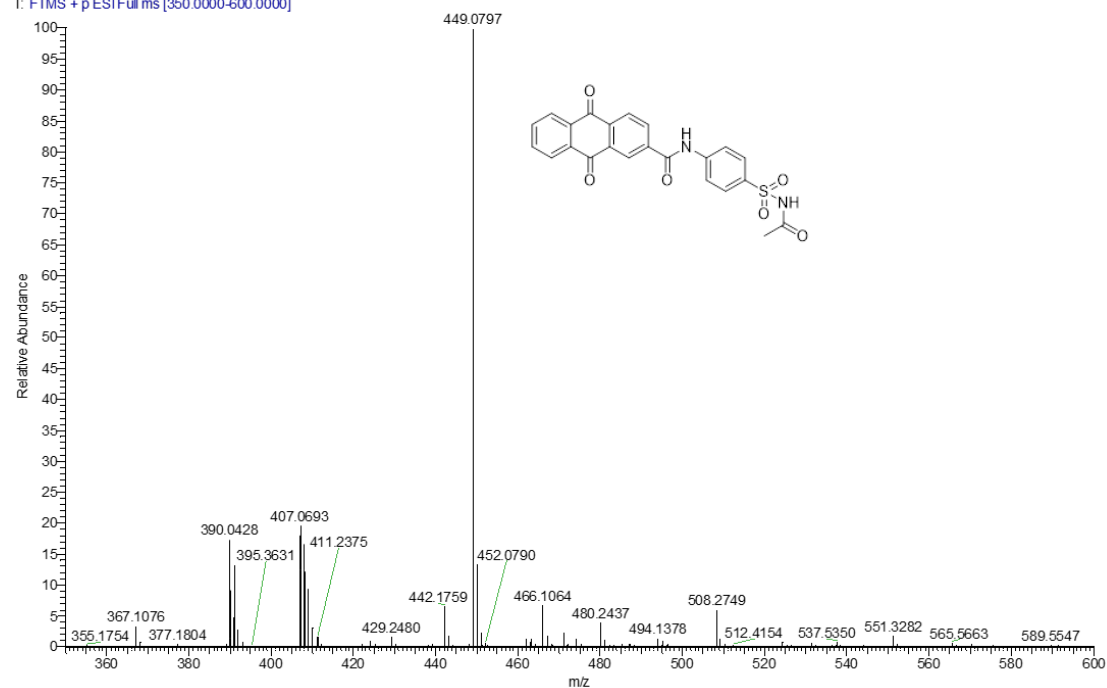

Data S24.HPLC data of compound 5c, 5h, 6c and 6h.

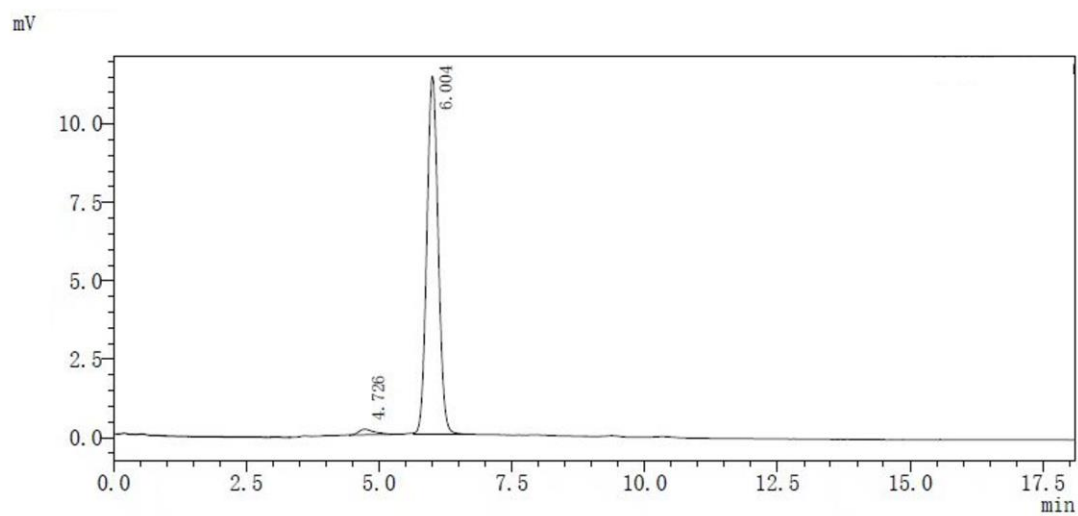

compound 5c

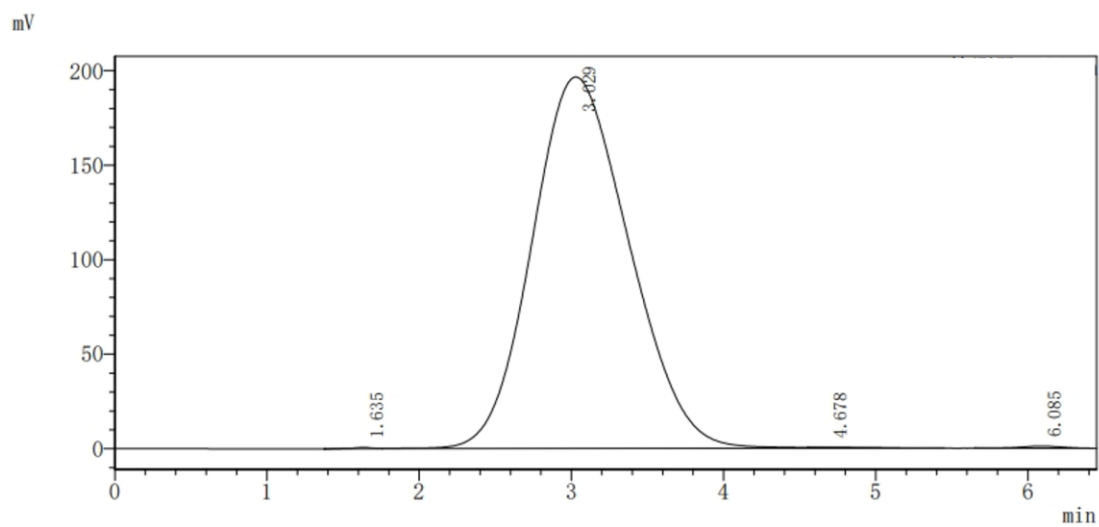

compound 5h

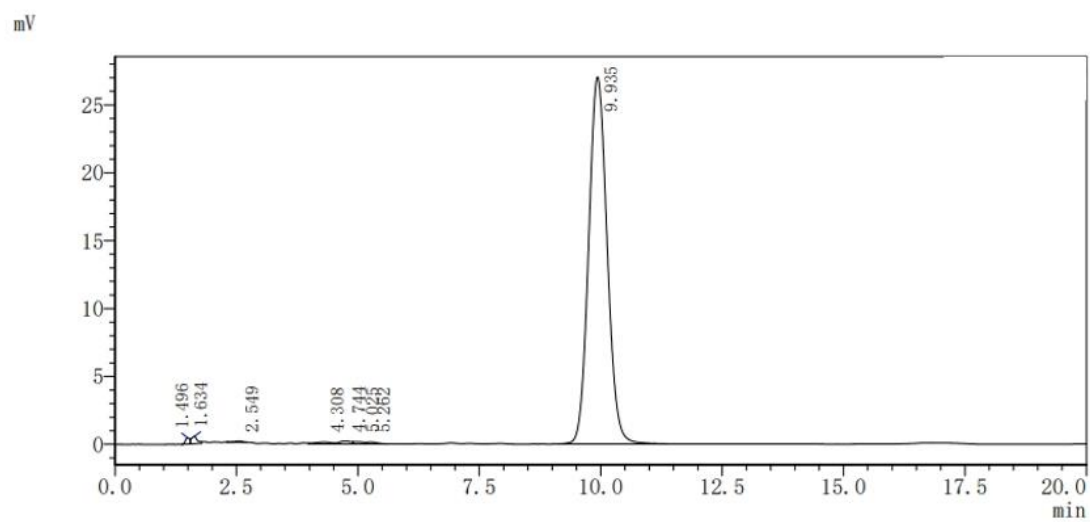

compound 6c

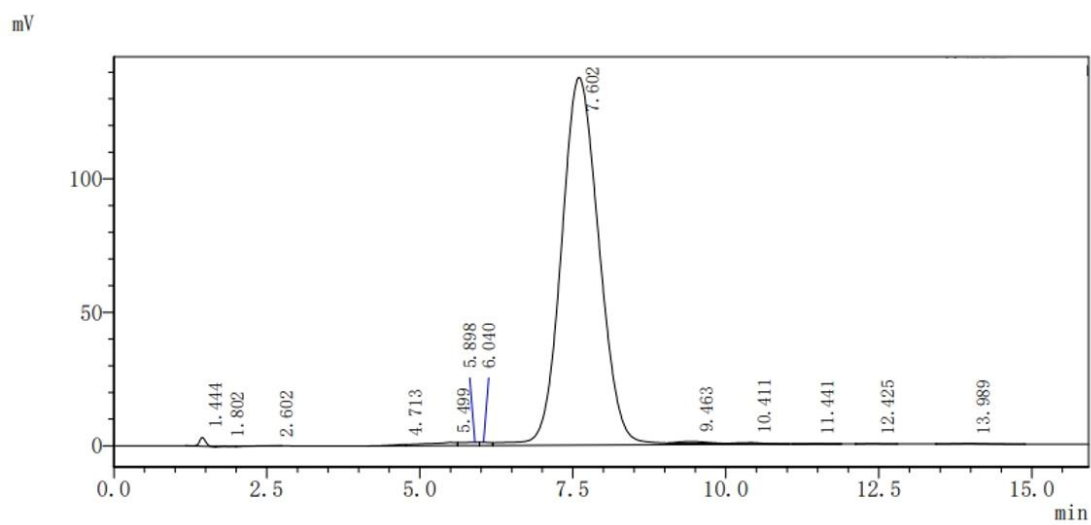

compound 6h
